1 **A Modular Computational Framework for the Rational Design and Exploration of Synthetic**  
2 **Development**

3  
4 <sup>1,\*</sup>Calvin Lam, <sup>1,2,†</sup>Leonardo Morsut

5  
6 <sup>1</sup>The Eli and Edythe Broad CIRM Center, Department of Stem Cell Biology and Regenerative Medicine,  
7 Keck School of Medicine, University of Southern California, Los Angeles, CA 90033-9080, USA

8 <sup>2</sup>Department of Biomedical Engineering, Viterbi School of Engineering, University of Southern  
9 California, Los Angeles, CA 90089-1111, USA

10 \*Present address: College of Medicine, University of Nebraska Medical Center, Omaha NE, 68198-0001,  
11 USA

12 †Correspondence: [Leonardo.Morsut@med.usc.edu](mailto:Leonardo.Morsut@med.usc.edu)

13  
14  
15  
16  
17  
18  
19  
20  
21  
22  
23  
24  
25  
26  
27  
28  
29  
30  
31  
32  
33  
34  
35  
36  
37  
38  
39  
40  
41  
42  
43  
44  
45  
46

47  
48  
49

## 50 SUMMARY

51

52 Synthetic development is a nascent field of research that uses the tools of synthetic biology to  
53 design genetic programs directing cellular patterning and morphogenesis in higher eukaryotic cells,  
54 mainly mammalian ones. Current design methods of these genetic programs proceed inefficiently, relying  
55 on trial and error processes. By contrast, computational models can act as rapid testing platforms,  
56 revealing the networks, signals, and responses required for achieving robust target structures. We  
57 introduce a computational model where contact dependent cell-cell signaling networks and cellular  
58 responses can be chosen in a modular fashion, allowing *in silico* recreation of known synthetic  
59 morphogenic trajectories such as those resulting in multilayered synthetic spheroids. By altering the  
60 modular components, our model also allows for the exploration of new trajectories that can result in  
61 hollowed, elongated, and oscillatory structures. Our model functions as a testing ground illuminating how  
62 synthetic biology tools can be used to create particular structures. In addition, it can provide valuable  
63 insight into our understanding of both imagined and extant cellular morphologies.

64

## 65 KEYWORDS

66

67 Synthetic biology, self-organization, tissue engineering, computational modeling, cellular Potts,  
68 juxtacrine signaling, synNotch, patterning, morphogenesis

69

## 70 INTRODUCTION

71

72 During the development of multicellular organisms, cells self-organize into complex tissue and  
73 organ architectures essential for proper function. Self-organization is driven by genetically encoded  
74 programs that dictate interactions at multiple biological levels, from cellular to tissue and organ levels  
75 (Santorelli et al., 2019; Toda et al., 2019; Turner et al., 2016). Deconstructive approaches, such as gene  
76 knock-out or interference experiments have traditionally been used to investigate how self-organization  
77 arises from these levels (Bashor et al., 2010; Libby et al., 2018). More recently, reconstructive approaches  
78 are increasingly being employed (Elowitz and Leibler, 2000; Li et al., 2018; Santorelli et al., 2018; Tigges  
79 et al., 2009). These approaches emphasize identification of the universal principles that govern life  
80 (Elowitz and Lim, 2010).

81 In the field of developmental biology, the goal of reconstruction is to understand primary  
82 components and their role in self-organization (Bashor et al., 2010; Davies, 2017; Lim, 2010; Mukherji  
83 and van Oudenaarden, 2009). For instance, which genes or genetic circuits, in which cells, allow and  
84 control specific natural or non-natural tissue development? Synthetic development seeks to integrate  
85 synthetic genetic circuits into cells to control both the stimuli they sense and their subsequent behavior in  
86 order to achieve synthetic multicellular development (Santorelli et al., 2019; Toda et al., 2018, 2019).

87 For example, by adding synthetic signaling and adhesion circuits to the genome of non-  
88 assembling cells, e.g. mouse fibroblast cells in culture, it is possible to achieve self-assembling patterned  
89 spheroids (Toda et al., 2018). Similar genetic circuits could, in theory, be used to design other  
90 developmental trajectories in such non-developing cellular systems, however it remains unclear exactly  
91 how to predict which genetic circuits would be required for any given target structure (Briers et al., 2019;  
92 Santorelli et al., 2019).

93           Currently, synthetic development programs are designed intuitively, based on literature search  
94 and preliminary experiments in simplified setups, before implementation into living cells. As a result,  
95 reconstruction attempts move slowly, relying on a cycle of design, cell implementation, behavior  
96 monitoring, redesign, and so forth. This can be both time-consuming and costly, therefore limiting  
97 exploration of the genetic circuits, behaviors, and experimental parameters critical for achieving desired  
98 structures and features (Briers et al., 2019). Arguably, the most limiting step of reconstructive approaches  
99 is the first, design, which indicates our incomplete understanding of the underlying biology. A sensible  
100 initial guess could be shown to be erroneous only after months of cell implementation work. In these  
101 situations where not everything is known, even semi-predictive computational models could be of  
102 significant value, allowing rapid implementation of many designs *in silico*. These various designs could  
103 be tested for viability and pre-optimized before biological implementation, thereby saving time and cost  
104 (Briers et al., 2019; Santorelli et al., 2019). Additionally, such a framework could both facilitate the  
105 design of novel tissues of potential biomedical interest and delineate which structures might or might not  
106 be possible (Elowitz and Lim, 2010; Ollé-Vila et al., 2016).

107           While current computational models can successfully replicate various natural developmental  
108 processes (Belmonte et al., 2016; Hester et al., 2011; Hutson et al., 2017; Lakatos et al., 2018; Lambert et  
109 al., 2018; Lin et al., 2009; Marin-Riera et al., 2018; Shaya et al., 2017; Swat et al., 2015), they exist  
110 disparately, functioning as highly specialized tools tailored to the specific mechanisms/programs of the  
111 focal biological system. In the case of synthetic development, an effective computational framework  
112 requires generalizability and modularity. In order to maximize the designs that can be tested *in silico*, the  
113 model must reflect the broadness and modularity of tools employed in synthetic biology itself. Such a  
114 framework would not only enable great flexibility in design testing, it would also facilitate the exploration  
115 of numerous parameters and networks promoting robust development as well as elucidating novel designs  
116 that could yield as yet unimagined structures of interest.

117           Here we describe the development and use of a computational framework for synthetic  
118 development circuit design. Inspired by the use of synthetic Notch (synNotch) pathways to program  
119 multicellular morphogenesis (Toda et al., 2018), the framework allows the design of synthetic cell-cell  
120 contact-dependent signaling networks with user defined cellular inputs and responses. In this paper, we  
121 first describe a generalizable cell-cell contact dependent signaling model (named GJSM, generalized  
122 juxtacrine signaling model) that could be modified to capture different types of signaling inputs and  
123 dynamics. We describe then the GJSM implementation the model in a cellular Potts environment (Swat et  
124 al., 2012) and how we pair the signaling with different behavioral outputs to mimic the modularity of the  
125 synNotch protein tool in an extended framework (Fig.1 and methods). We describe then the use of this  
126 framework to recapitulate currently implemented synthetic structures like multi-layered spheroids (Fig. 2-  
127 4). Finally, we describe several design-implementation-test cycles for novel genetic programs for other  
128 multicellular behaviors such as hollowing, elongation, and oscillation (Fig. 5-7). We believe that this type  
129 of framework will enable the field to move towards a more deterministic and constructive understanding  
130 of developmental signaling logic.

131

## 132 **RESULTS**

133

### 134 ***Brief overview of the computational method (for more details see STAR Methods)***

135

136           Our computational model captures contact-dependent signaling and links it to various changes in  
137 cell behaviors. Cell-cell signaling that relies on contact-dependence (aka juxtacrine) generally functions  
138 using similar logic: if cell (A) expressing a ligand is in contact with cell (B), and cell (B) expresses the  
139 cognate receptor for that ligand, then cell (B) will express the target genes (Bosenberg and Massagué,

140 1993; Massagué, 1990; Massagué and Pandiella, 1993) (Fig. 1a, Biological). When target gene products  
141 accumulate sufficiently, the behavior of the responding cell (B) changes (Fig. 1b, Biological).

142 To model this modality of signaling, we conceptually separated it in two parts: (i) signaling-  
143 dependent continuous changes in target gene expression in receiver cells, and (ii) gene expression  
144 dependent change in cell behavior (see STAR methods for full details). For the first part, we use  
145 differential equations to model input-dependent response. The strength of the response (target gene  
146 induction) in the receiver cell over time depends on several factors: the number of sender cells, the  
147 number of ligands on each sender cell, the number of receptors on the receiver cell, and the amount of  
148 contact between sender(s) and receiver. In a simplified two cell case with sender cell (A) and receiver cell  
149 (B), if the receptors on (B) are in excess, signaling depends primarily on the amount of ligand on cell (A)  
150 and the fraction of (A)'s surface contacting (B) (Fig. 1a, Biological). To capture this signaling, we define  
151  $L$  as the number of ligands on cell (A)'s surface and  $\Phi$  as the fraction of (A)'s surface in contact with  
152 (B)'s surface. We can then define the signal  $S$  that cell (B) receives as  $S = \Phi * L$  (Fig 1a, Model). Increasing  
153 the fraction of shared surface induces a stronger response (Fig. 1a, right graph). This is one specific case  
154 of signaling, where ligand is limiting; for the generalized model, see STAR methods. This part of the  
155 model (Fig. 1a) accounts for the continuous changes in gene expression in receiver cells.

156 To model the target gene expression dependent change in cell behavior, we take a step-wise  
157 approximation where we define thresholds of gene activation that induce transition from a basal cell state  
158 to an activated state and vice versa. In this way, behavioral transitions are discrete instead of continuous  
159 (Anderson, 2005; Hester et al., 2011; Hutson et al., 2017) (Fig. 1b, right graph). Thresholds for transition  
160 from basal to active state and back from active to basal state can be different and are defined as model  
161 parameters. The state machine schematic for this type of network is proposed in Fig. 1b, Model.

162 The two parts of the model, continuous signaling and discrete response, are highly modular and  
163 can be designed independently of one another.

164

### 165 ***The Model Qualitatively Recapitulates Simple Synthetic Structures***

166

167 Known synthetic development structures are currently derived from juxtacrine signaling  
168 dependent expression of different adhesion proteins (Toda et al., 2018). In this *in vitro* assays, cells are  
169 engineered with the appropriate signaling networks and responses, then between 20 and 200 cells are  
170 mixed together and grown for 2-3 days in ultra-low attachment plates, and their morphological and  
171 signaling evolution is followed via fluorescent microscopy. The first example is the two-layer spheroid  
172 (Fig. 2a); it is the result of a single forward network where CD19 on (A) blue cells bind to an  $\alpha$ CD19  
173 synNotch receptor on (B) gray cells to drive expression of green fluorescent protein (GFP) and E-  
174 cadherin, a homotypic adhesion protein (Toda et al., 2018). When approximately 100 (A) and 100 (B)  
175 cells are mixed together in a non-adhesive extracellular environment (ultra-low attachment, U-bottom  
176 plates), signaling induces (B) cells to become GFP-positive and preferentially adhere to one another. The  
177 (B) cells then deform to the extent where they cannot be individually distinguished from one another and,  
178 over time, form the inner layer of the spheroid. Blue (A) cells remain on the outer layer (Toda et al.,  
179 2018).

180 To replicate the *in vitro* experimental setup *in silico*, we defined cell signaling and response  
181 behaviors in L929 analogs that we call *in silico* L929 (ISL929); we then “mixed” these cells by  
182 initializing 20-200 cells in a 100x100x100 lattice containing an inert medium (to model ultra-low  
183 attachment plates), as a radially symmetric blob to maintain a consistent initial cell aggregate shape while  
184 also maintaining a similar cell total and ratio to that of the reference experiment (more info in the STAR  
185 methods, Computational Methods Details chapter). We then ran the simulation for 1000 monte carlo steps  
186 (mcs) per one hour of experiment time and follow the evolution of signaling and morphology (timescale



187 was determined by comparing the qualitative and quantitative space-time morphological evolution, and  
188 (A') and (B') activation rate, to that of the reference three-layer experiment, see below Fig. 3d-e).

189 To simulate the 2 layer spheroid in this setup, we programmed our *in silico* L929 (ISL929, see  
190 STAR Methods) cells with the same logic as the *in vitro* (Fig. 2b): (A) cells in contact with (B) cells send  
191 activation signals to (B) cells; (B) cells accumulate target genes over time if signaled to and with  
192 sufficient target gene level, excite to (B'). (B') cells adhere to other (B') cells and they can take a more  
193 compacted morphology, via relaxation of their spherical morphology constraints  $\lambda_{\text{Sur}}$  and  $\lambda_{\text{Vol}}$  (See STAR  
194 Methods for details). Starting with a mixture of approximately 100 (A) and 100 (B) cells, we consistently  
195 ( $n=3$ ) obtained two-layer structures (Fig. 2b) qualitatively similar to that of the *in vitro* results (Fig. 2a).  
196 We noticed that this 2-layered structure could be generated for a number of values of adhesion matrix (not  
197 shown).

198 One way to quantitatively track sorting is to follow a homogeneity index (Flenner et al., 2008;  
199 Olimpio et al., 2018; Sun and Wang, 2013); we define a homogeneity index for a given cell type, based  
200 on the average percentage of surface area that the cells of that cell type share with either other of the same  
201 or of different cell types. This measure ranges from 0 to 1, with 1 indicating maximal homogeneity (see  
202 STAR Methods, Simulation Quantifications). We followed sorting over time by quantifying homogeneity  
203 index of cells (B)/(B') and (A) separately over time. The homogeneity index increases only slowly for  
204 cells of type A, reflecting the lack of active sorting for A cells, and instead increases dramatically for cells  
205 B/B', starting from around when the induction of transition  $B \rightarrow B'$  happens (around 7000 mcs, Fig. 2b).

206 We noted that, from the *in vitro* system, it does seem that the reversion to the ground state is little  
207 or negligible. Computationally here we used an approximation where the active state B' never goes back  
208 to B. We compared, in the context of 3-layered structures below (Fig. 3c and S3), the results of  
209 simulations with this approximation with ones where the threshold for activation was the same as of  
210 induction, and we did not see statistic differences, which motivated us to keep this assumption of  
211 "irreversibility" for the positive-feedback based networks.

## 212 ***The Model Recapitulates Higher-order Synthetic Structures Qualitatively and Quantitatively***

### 213 **QUALITATIVE**

214 While the two-layer structure is the result of a single forward network, we hypothesized that the  
215 model could easily be expanded to capture morphologies resulting from higher order signaling. We tested  
216 this hypothesis by extending the forward network to a back-and-forth network where (A) activates (B),  
217 then (B') activates (A). This network was used *in vitro* to generate both central-symmetric 3-layered  
218 structures (Fig. 3) and also non-central symmetric structures (Fig. 4), based on the choice of adhesion  
219 molecules.  
220 structures (Fig. 3) and also non-central symmetric structures (Fig. 4), based on the choice of adhesion  
221 molecules.

222 One first central-symmetric 3-layered structure is the so-called 3-layered structure. *In vitro*, this is  
223 accomplished by modifying the forward network such that (B) cells express GFP-ligand that binds to  
224  $\alpha$ GFP-ligand synNotch on blue (A) cells, driving blue (A) cells' expression of mCherry and low E-  
225 cadherin. When around 200A cells are mixed with around 40B cells, the first step is the induction of B  
226 cells to B'; the B' cells are homotypically adhesive so they form the core, and they also signal to cells A  
227 to induce them to A'. (A') cells are moderately adhesive to (B') cells and weakly to (A') cells (Toda et  
228 al., 2018) (Fig. 3a, Development 0-20hr).

229 The implementation *in silico* follows the same design logic. The forward network used to  
230 generate the two-layer structure is modified such that the excited (B') state gains a ligand communication  
231 channel that can signal to (A) and (A') cells that express the cognate receptor. The adhesion matrix is  
232 modified such that the (A') cells are intermediately adherent to (B') and weakly to the rest of the cells  
233 (Fig. 3b). When we simulated the development of a system comprising around 200A and 50B cells, we

234 observed that there was first induction of B to B' cells that formed a core. Then the B' cells started to  
235 communicate to the A cells to turn red starting (Fig. 3b, Development). At the endpoint we observed  
236 structures similar to that of the *in vitro* results, a three-layer structure consisting of a green core  
237 surrounded by concentric shells of red, then blue (Fig. 3b and Movie S1). We also obtained similar  
238 structures when we started from different amount of cells A and B (Fig. S1 and Movie S2). *In silico*, we  
239 showed that signaling is necessary for three-layer formation: without excitation to (B') and (A'), no  
240 sorting occurred either qualitatively or quantitatively (Fig. S2). Of note, the three-layer structure has  
241 known regenerative capabilities *in vitro*, reforming the three-layer structure if bisected (Toda et al., 2018)  
242 (Fig. 3a). *In silico* three-layer structure also exhibited regeneration, but only partially (Fig. 3b and Movie  
243 S3). Reasons for this are addressed in the discussion.

244 At this point we carried out a fine-tuning of the parameters to qualitatively match the timelines of  
245 activation; we converged to model parameters for which 1000mcs = 1h by comparing the *in silico* and the  
246 *in vitro* timelapse stills. For example, the activation of green cells occur at around 7000mcs *in silico*, and  
247 the activation of red cells occur at 13,000mcs. This alignment was achieved by tuning the parameters.

248 Other, non-central-symmetric synthetic structures were generated with the back-and-forth  
249 network, differing in the signaling-induced adhesion proteins (Toda et al., 2018). Once we identified the  
250 signaling parameters that would best recapitulate the three layers structure, we moved to the other  
251 structures. We decided to keep the signaling parameters consistent between networks (same signaling  
252 parameters for all back-and-forth). Moreover, when E-cadherin was used again, we used the same  
253 numerical values across different simulations. For new cadherins, we estimated the value by best-  
254 guessing based on literature, and by fine tuning the similarity of the structures that we obtained to the *in*  
255 *vitro* structures. By modifying the adhesion matrix to reflect different cadherin-type adhesion and the  
256 corresponding spherical morphology constraints to reflect deformation in adhesive cells we were able to  
257 recapitulate the structures derived from the back-and-forth signaling network *in silico* with the correct  
258 timescale (Fig. 4a, Fig. S4-S5, Movies S3-7).

259

## 260 QUANTITATIVE

261 Quantifying morphogenesis is known to be relatively difficult. Nevertheless, we wanted to have a  
262 quantitative sense of whether our computational models were able to recapitulate the *in vitro* systems,  
263 apart from the qualitative observed likelihood of the images.

264 We decided to first focus on the target gene expression dynamics. We first measured the target  
265 gene induction over time in the *in vitro* system, from the timelapse movies; the % induction of GFP is the  
266 normalized amount of green fluorescence over time, and we can follow how that increases over time,  
267 starting from around 5-7h. For the *in silico* system, the quantification is on the activated cells, with the  
268 last time step normalized to 1. Fig. 3c shows the similarity between the induction dynamics *in vitro* and *in*  
269 *silico*, both for the green and the red channel. Interestingly, the similarities are not only in the induction  
270 time (which we obtained through parameter tuning), but also on the slope and shape of the curves, which  
271 have not been target of parameter optimization. This shows that our model can quantitatively recapitulate  
272 the time evolution of signaling over time of the *in vitro* system.

273 We wanted then to assess whether the morphological evolution over time *in silico* was similar to  
274 that *in vitro*. *In vitro*, we noticed from the published time-lapse of the three-layered structure development  
275 that the circularity of the structures in the 2D projection evolves over time to reach a steady state by the  
276 end of simulation; this was both true for the overall structure and of the cadherin-expressing cells (Fig.  
277 3d). To quantify these features, we defined a circularity index in 2D and a sphericity index in 3D for the  
278 comparison of the *in vitro* and *in silico* structures (see STAR methods, Video Analysis). When we  
279 measured these morphology indexes over time, we found that they generated similar temporal evolution  
280 and convergence to a steady state by the end of simulations.

281 Lastly, we wanted next to assess how much the computational system is able to quantitatively  
282 capture robustness of the development, which is an emergent property of the biological counterparts.  
283 Although the synthetic development of the *in vitro* structures does not happen identically 100% of the  
284 times, it is reported to form a similar structure with one core in the 57% of the times (Toda et al., 2018).  
285 We wanted to see if our computational system, based on the stochasticity of the cellular potts evolution  
286 algorithm, would recapitulate this feature. To measure reproducibility of the *in silico* system, we  
287 quantified the number of cores formed over repeated simulations (n=30 simulations). We saw that the  
288 majority of the simulations yielded a 1-core structure, some a 2-core, and a minority a non-core structure  
289 (Fig. 3c). We compared this distribution to the distribution of morphologies obtained in the biological  
290 system (Toda et al., 2018), and found them similar (Pearson  $\chi^2=0.24$ , d.f.=2,  $P>0.89$ ), indicating that our  
291 *in silico* system can recapitulate reproducibility features of the *in vitro* cellular systems.

292 We also tested whether these quantitative analysis were dependent on the reversibility of the  
293 induction. A chi-squared analysis did not reveal a significant difference from the *in vitro* core distribution,  
294 Pearson  $\chi^2=4.75$ , d.f.=2,  $P>0.09$ . Quantitatively, the sphericity and activation timescale were similar to  
295 that of *in vitro* circularity and activation (Fig. S3b).

296

### 297 ***The Model Recapitulates Synthetic Structures Generated by Lateral Inhibition Circuits Starting from*** 298 ***Genetically Uniform Cell Populations***

299

300 Our model can recapitulate synthetic structures resulting from single or multiple levels of  
301 activation juxtacrine signaling. However, patterning and morphogenesis can also result from inhibition  
302 juxtacrine signaling as in the classic example of checkerboard patterning from lateral inhibition (Cohen et  
303 al., 2010; Collier et al., 1996; Ghosh and Tomlin, 2001; Shaya et al., 2017; Simakov, S A David and  
304 Pismen, 2013; Sprinzak et al., 2010, 2011). To capture inhibition juxtacrine signaling, we modified our  
305 model such that,  $S \rightarrow S$  (S is signal) and  $\beta \rightarrow \beta$  (threshold of signaling) to yield high signaling to low  
306 reporter production and low signaling to high reporter production (See STAR Methods). We tested the  
307 inhibition version of the model on lateral inhibition by generating the following network: red (A) cells  
308 send inhibition signals to neighboring red (A) and (A') green cells (Fig. S6a). The inhibition signal then  
309 inhibits red color, representing red reporter fused ligand and activates green reporter. Red (A) cells with  
310 sufficient red inhibition/green activation excite to (A') green. In order to allow reporter inhibition as  
311 required in lateral inhibition, we set the reversion threshold equal to the activation threshold. The network  
312 is predicted, starting from genetically uniform cells, to generate cell states differentiation. To test if this  
313 was true in our setup, we simulated development starting from a static, regularly shaped monolayer of red  
314 (A) cells, and we were able to obtain the classic checkerboard pattern of lateral inhibition (Fig. S6,  
315 Model, top). We then tested this lateral-inhibition network on a disordered cell monolayer where cells  
316 move slightly around their position, and begin with different sizes, don't grow and don't divide. By  
317 adjusting the signaling parameters to reflect strong inhibition (del Álamo et al., 2011; Sprinzak et al.,  
318 2010, 2011), we obtained clean checkerboard patterning (Fig. S6b, model, bottom). Our model also  
319 accounted for fate bias due to cell size, a recently documented phenomenon of lateral inhibition (Shaya et  
320 al., 2017). We found that smaller cells were significantly more likely to be of the sender fate (high Delta)  
321 and large cells more likely to be of the receiver fate (high Notch) (n=10 lattices of ~400 cells each, Delta  
322 cells:  $108.82 \pm 1.59$  pixels<sup>2</sup>, Notch cells:  $122.53 \pm 1.89$  pixels<sup>2</sup>, two-tailed matched t-test, d.f.=9,  $t=14.90$ ,  
323  $P<0.0001$ ).

324 Finally, we added adhesion of our inhibition model to test whether it could recapitulate, *in silico*,  
325 the multicellular synthetic 3D structure demonstrated *in vitro* using lateral inhibition and adhesion. The *in*  
326 *vitro* network consists of red (A) cells expressing mCherry fused CD19 and  $\alpha$ CD19 synNotch (Toda et  
327 al., 2018). When  $\alpha$ CD19 synNotch is bound to mCherry fused CD19 on a neighboring cell, mCherry

328 fused CD19 expression is inhibited, while GFP and E-cadherin expression is activated. This yields green  
329 cells that adhere to other green cells, thereby forming a two-layer structure with a shell of red cells  
330 surrounding a green core (Toda et al., 2018) (Fig. 4b left and Fig. S6c left).

331 To obtain this network *in vitro*, we modified the lateral inhibition network model such that green  
332 (A') cells adhere to other green (A') cells (Fig.4b, Model, Adhesion Matrix). When we run the simulation  
333 over time, starting from an aggregate of around 100 cells, we observe that first some of the red cells  
334 become green, and then that the green cells meet each-other in the center of the aggregate, similarly to  
335 what happens *in vitro* (Fig. 4b and S6c, *In silico*). Over time in the *in silico* system we observe that these  
336 green cells do sometime revert to red, leaving in the center an active dynamic of green cells turning red  
337 and being moved to the external layer (not shown).

338

### 339 ***Synthetic Hollowing can be Achieved by Apoptosis***

340

341 With evidence of biological replicability of multiple structures, we then generated and tested a  
342 series of new programs for interesting morphologies. We started with hollow structures due to their  
343 developmental importance (e.g. the blastocyst (Watson, 1992), tubes (Nelson, 2003), and clinical  
344 relevance (e.g. polycystic kidney disease (Qian et al., 1996)).

345 We reasoned that the two-layer structure could provide an ideal starting point for generating a  
346 hollowed structure, if we fate the cells in the core to apoptosis. A mixture of A and B cells would initially  
347 engage in communication so that B cells would convert to B' adhesive cells and form a core. After the  
348 core is formed, the cells of the core would die to leave space for a cavity. Figure 5a shows our ideal target  
349 trajectory.

350 We thought that the implementation could start from the two-layer network (Fig. 2) for the  
351 formation of 2 layers. For the simulation of cell death, we converted cells to “medium” type cells to  
352 physically conserve cavity volume. Otherwise, it would behave as a vacuum rather than a medium-filled  
353 void. When we tried the simple implementation where the green cells are fated to apoptosis, we  
354 encountered a number of problems: the cells committed apoptosis before forming a core, and if more time  
355 was allowed for apoptosis, then the inner core of B' green cells would not receive the further signals for  
356 transitioning to media (not shown). To resolve these two issues, we introduced two modifications. (1) To  
357 have a controlled timing of response, with first increase of adhesion, and then commit to death, we  
358 introduced two thresholds for activation: one, lower, for activation of adhesion; a second, higher, for cell  
359 death. (2) To sustain signaling among B' cells, we equipped B' cells with signaling capacity on top of  
360 receiving capacity (Fig. 5b). Therefore, (B) cells with sufficient reporter activation become (B') and then  
361 may, with further reporter activation, convert to medium.

362 When we simulated this network, the formation of a hollow structure was at first incomplete, as  
363 the outer layer did not coat completely the inner core (not shown). In order to achieve complete coating of  
364 the cavity, we introduced a couple of variations: (B') cells neither grow nor divide, and (A) cells grow  
365 and divide slightly faster (see STAR methods). This transformed the two-layer structure into a hollow  
366 structure with a simple hollowed shell of blue (A) cells 50% of the time in a total of 10 runs, when  
367 starting from a mixture of  $121.6 \pm 7.28$  blue (A) and  $57.4 \pm 7.28$  gray (B) cells (Fig. 5c).

368 We propose that such network could be generated, *in vitro*, with an extension of the 2-layer  
369 network, where the response of B cells include: E-cadherin, ligand, G1 arrest; and, with lower efficiency,  
370 cell death (Fig. 5d). The *in silico* simulations use ISL929 (*in silico* L929) with slightly increased  
371 growth/division rates, which could be simulated by experimental conditions under low-dose mitogens  
372 insufficient to override (B') G1 arrest from p21 (Fig. 5d).

373

### 374 ***Elongation can be Achieved by Modulating Motility, Growth, and Activation Timescale***

375



376 We next aimed to achieve elongated structures. Elongated structures have yet to be achieved  
377 synthetically *in vitro* but, like hollow structures, bear marked relevance in developmental processes.  
378 Inspired by the developmental processes of somitogenesis (Gossler and de Angelis, 1997; Hester et al.,  
379 2011; McGrew and Pourquié, 1998), bone growth (Kobayashi et al., 2005; Li and Dudley, 2009),  
380 wavefront activation and fluid-to-solid transition (Mongera et al., 2018), we developed the goal trajectory  
381 in Fig. 6a. We planned to start from a mixture of two cell types, (A) and (B), which would first form two  
382 poles via adhesion-mediated sorting (step 1). A and B cells would then signal to each other to induce the  
383 activated cell types, (A') and (B') at the interface (step 2). Activated cells A' and B' would stop  
384 proliferating and acquire a more “solid-like” features that inhibit further movement and sorting. Activated  
385 cells A' and B' would acquire also a signaling capacity for cells of the same type (A' towards A and A',  
386 and B' towards B and B') that would induce activation. In this way, at the interface between blue cells  
387 and red cells, the activated red cells A' are signaling to inactive A cells (blue) to become red. As the  
388 inactivated cells A and B keep proliferating, we reasoned that these areas on either end with reserve A  
389 and B cells could be poles able to provide an engine for growth.

390 To implement this synthetic developmental trajectory, we thought of describing a symmetric  
391 system where two cell types A and B work symmetrically. In the inactive state, they have homotypic  
392 adhesion preference, and low heterotypic adhesion. They also signal to each-other to activate to A' and B'  
393 respectively. The active state, for example A', gains different features: a signaling capacity towards same  
394 cell type (both A and A' have the receptor for this new signal), reduced motility and inhibited growth and  
395 division (Fig. 6b).

396 Seeding a mixture of approximately 30 (A) and 30 (B) cells with a first parameter set  
397 (Implementation 1 in Fig. 6c) led to the formation of short elongated structures in ~50% of the  
398 simulations. Elongation terminated between 20,000-50,000 mcs with 100% loss of both poles (only one  
399 run had (B) cells remaining as a small spheroid isolated from the elongated structure) (Fig. 6c). We  
400 wanted to see if we could optimize the growth to obtain continuous growth. We suspected that unreliable  
401 elongation was due to initial conditions that did not support pole formation (step 1 in Fig. 6a). We  
402 therefore hypothesized that robustness could be improved by seeding with separate spheroids of (A) and  
403 (B). This simple change in initial condition led to consistent, improved elongation overall (100%  
404 bidirectional elongation) and in both cell genotypes in all runs, even though only 40% of the structures  
405 retained both caps (Fig. 6d). This suggests that the incomplete elongation observed with Implementation  
406 1 was due to an incomplete interface formation. It also suggested a way to improve elongation: increasing  
407 time delay between sorting (step 1) and activation (step 2). We therefore generated an Implementation 2  
408 of the same network, where the activation threshold for A to A' and B to B' were higher, and so they took  
409 longer to happen. With this implementation we observed markedly improved elongation, both overall  
410 (Fig. 6f), and comparison to genotype from an initial mixture of cells,  $68.67 \pm 9.27$  pixels with  
411 Implementation 2 vs  $48.95 \pm 8.28$  pixels with Implementation 1 (significantly longer, two-tailed t-test,  
412  $t=5.01$ ,  $P < 0.0001$ ). Furthermore, 80% of the structures obtained with Implementation 2 retained the  
413 capability to elongate by retaining the (A) caps and (B) caps (Fig. 6e).

414 *In vitro*, this can be achieved by requiring higher amount of red and green reporter, relative to  
415 associated proteins, to achieve the phenotypic transition, a similar method to that employed in the  
416 hollowing network. This would allow to start from uniformly mixed cells, which is an easier to obtain  
417 initial condition.

418

### 419 ***Strongly Inhibiting Receptor Expression Allows Morphological Oscillation In Silico***

420

421 The previous structures were inspired by existing biological structures, but synthetic biology can  
422 be expanded to potential structures as well (Elowitz and Lim, 2010). We wanted to see if we could

423 generate the networks for a “limit-cycle” attractor for the dynamic, i.e. a morphological oscillator. We  
424 tested our model’s capability to explore possible structures by focusing on a novel morphological  
425 oscillator, oscillating between a highly mixed (A) and (B) structure (low homogeneity) and a poorly  
426 mixed (A’) and (B’) structure (high homogeneity) (Fig. 7a). Previous studies suggest that the low  
427 homogeneity structure can be achieved via heterotypic adhesion (Brodland and Chen, 2000; Glazier and  
428 Graner, 1993; Togashi et al., 2011) and simulations performed in this study suggest the high homogeneity  
429 structure can be achieved via homotypic adhesion, but the network required to link the two is unknown.  
430 We reasoned that the two states could be implemented by a switch-like behavior in the adhesion  
431 repertoire of the A and B genotypes. In their inactivated state, A and B cells would have heterotypic  
432 adhesion molecules (e.g. ephrins, nectins (Togashi et al., 2011), Het.Ad.1a and Het.Ad.1b in Fig. S8a)  
433 that would favor the checkerboard pattern. In their activated state, heterotypic adhesion would be replaced  
434 by two different homotypic adhesion molecules that would favor the formation of two poles (e.g. N-  
435 cadherin and P-cadherin, Homot.Ad.1 and Homot.Ad. 2 in Fig. S8a). The switch behavior relies on a  
436 receptor that can both inhibit and activate target genes. *In vitro* this could be achieved with expression of  
437 two synNotches with the same extracellular domain, and two different intracellular domain, one for  
438 activation one for repression (Morsut et al., 2016). We reasoned that some form of signaling could  
439 generate continuous oscillation between the two morphologies without reaching a stable endpoint.

440 We started by testing a simple version of the network where (A) and (A’) cells and (B) and (B’) cells  
441 have the same signaling capacity. A cells signal to B cells to switch their adhesion repertoire and  
442 vice versa: in the basal state cells have high heterotypic adhesion; in the activated state both the cell types  
443 have high homotypic adhesion. Seeding a mixture of 30 (A) and 27 (B) cells led to a multistep trajectory  
444 as follows: initial formation of a highly mixed structure, activation of A and B cells to A’ and B’  
445 respectively, formation of 2 poles. At this point, although the cells far from the interface reverted to the  
446 basal states, the interface became interlocked as A’ cells are signaling to B’ cells to maintain them in an  
447 activated state, and vice versa (Fig. 7b, network 1). This structure was stable and demonstrated no clear  
448 oscillatory behavior, showing that morphological separation alone was not enough to induce the  
449 oscillatory behavior because (A’) and (B’) still signal to each other, stabilizing the interface.

450 The above results suggest that morphological separation is not sufficient to bring the cells back to  
451 the initial state. We next tested the case where signaling capacity of the activated cell states is different  
452 from basal state. First, we tried ligand repression in the activated state in order to make the cells less  
453 capable of signaling to each other in the active state, thus favoring a return to ground state (Network 2).  
454 Seeding a mixture of 30 (A) and 27 (B) cells yielded overdamped morphological oscillation, with the  
455 endpoint being (B) cells locking (A) cells into the (A’) red fate (Fig. 7c).

456 To prevent this locked endpoint, we adjusted the network such that the inhibition signal inhibited  
457 receptor expression instead of ligand expression. This led to quicker and sustained transition of the  
458 excited state to the ground state. In addition, this adjustment forced signaling coupling to generate robust  
459 morphological oscillations (Fig. 7b network 3) that lasted at least 13 cycles (Fig. S8b) with minimal  
460 dampening. This suggests that receptor expression can be used to generate stable intermediate states  
461 where sorting can be reverted.

## 462 463 **DISCUSSION**

464 Multicellular self-organization is a key facet of development and tissue formation. Numerous  
465 recent advances in synthetic biology (Baumler et al., 2017; Barnea et al., 2008; Conklin et al., 2008;  
466 Daringer et al., 2014; Hartfield et al., 2017; Morsut et al., 2016; Qudrat and Truong, 2017, 2018; Scheller  
467 et al., 2018) have made it possible to control this process, facilitating synthetic reconstruction of native  
468 morphogenic processes and enabling custom tissue development. However, reconstruction and design  
469 often rely on a lengthy trial and error process. An initial design is implemented biologically and



470 subsequently modified for improvement in an iterative and lengthy process. Computational models can  
471 provide support by allowing rapid implementation of various designs *in silico*. In this way, robust  
472 formulas can be identified and selected before being implemented experimentally, effectively catalyzing  
473 reconstruction efforts and enabling rational design. Here we present the first of such models, focusing  
474 specifically on synthetic juxtacrine signaling, and demonstrate its ability to replicate synthetic  
475 morphogenesis and facilitate synthetic design. We began by recapitulating known synthetic structures  
476 along with their key features: morphology, self-organization, variability and dynamics. We then used the  
477 model to test, improve, and propose potential designs for yet to be achieved structures in synthetic  
478 biology: hollow, elongated, and oscillatory.

479 Our model demonstrates biological faithfulness, replicating numerous facets of currently known  
480 high complexity mammalian synthetic structures: back-and-forth, symmetrical, asymmetrical, and lateral  
481 inhibition. Nevertheless, the model can still be further improved, as evidenced by the incomplete  
482 regeneration of the three-layer structure. Several reasons are possible for the lack of blue (A) cells at the  
483 bisected area *in silico* (Fig. 3b), with the first, but unlikely, consideration being the (A) adhesion  
484 parameters. In the simulations, (A) cells have minimal adhesion, preferentially adhering to cells rather  
485 than medium, but with no preference between cell types (see Fig. 3b matrix or Table S1). Therefore, a  
486 simple remedy is to alter (A) cells to bear differential adhesion to (A') and (B'), driving them to the  
487 damaged area. However, this is unlikely as it contradicts other *in vitro* images of the same circuit; the lack  
488 of a smooth (A) layer, especially evident from the 3D reconstruction of a three-layer in the reference  
489 experiment, along with the retention of a rounded morphology even when contacting (B') or (A'),  
490 strongly indicates that (A) lacks differential adhesion to other cell types (Toda et al., 2018). A more  
491 plausible explanation is that the computational model is an idealized version of the experiment, performed  
492 with machine-like precision difficult to achieve humanly. Immediate post-bisection structures *in vitro*  
493 have noticeable imperfections such as latching cells post bisection and prominent proximal cells in  
494 suspension (Toda et al., 2018); these cells can easily reattach to aid regeneration. With the model  
495 demonstrated to be capable of powerful biological replication under controlled conditions, the foundation  
496 is established. The next step is to deliberately introduce “imperfections” to further improve similarity to  
497 realistic experimental setups. More importantly, this improvement raises an interesting question; can these  
498 “imperfections” be used to our advantage in rational design, for example, improving robustness?

499 Our model also generated interesting observations when we tried to design novel developmental  
500 trajectories that have not yet been implemented *in vitro*. Going through phases of design-test-learn-  
501 redesign can elucidate which parameter sets confer robustness to various trajectories and which instead  
502 perform poorly.

503 In particular, when designing the elongating trajectories, we realized that without a fluid-to-solid  
504 transition we could not achieve directional elongation in our simulations. These types of transitions are  
505 shown to be at work during embryogenesis (Mongera et al., 2018). It would be powerful to understand the  
506 molecular underpinnings of these transitions and begin to control them *in vitro* in synthetic systems. We  
507 also observed that our first elongation network (network 1) was not very efficient in generating elongated  
508 structures; however, when we changed the initial conditions, the same genetic network did generate  
509 robust elongating structures. In and of themselves, boundary conditions could generate diversity, even  
510 without changes in the genetic program. During embryogenesis, initial conditions for a phase of  
511 morphogenesis are often dictated by a preceding phase of morphogenesis. For instance, the formation of  
512 two poles is the initial condition for subsequent elongation. By changing the dynamic of a previous phase  
513 of morphogenesis, we could affect a second phase without altering genetic program and the dynamic of  
514 the second phase directly.

515

516 As we attempted to create a trajectory leading to a stable oscillatory structure (Fig. 7), we learned  
517 valuable lessons from trajectory iterations that failed. We first thought that the strong homotypic adhesion  
518 within A' and B' cells by would be sufficient to separate the two group of cells so that they would not  
519 signal to each other. However, in the simulations we saw that the presence of an interface where A' cells  
520 and B' cells are still touching and signaling to each other prevented them from reverting back to the basal  
521 A and B states. We were able to overcome this when we had the communication between A and B cells  
522 change the network itself, so that A' and B' cells would have a reduction in signaling capacities. We  
523 made minimal progress when we removed the ligands from activated cells but saw more dramatic effects  
524 when we removed the receptors from activated A' and B' cells. This type of regulation seemed important  
525 to generate states that are basis for subsequent morphogenesis, and, together with the dynamics explored  
526 for the elongating structure, point to the need to pay attention to how the multistep developmental  
527 trajectories are linked together, and the dynamics of that as an engine of diversity, that might have been  
528 used during evolutionary times.

529 The model presented here enables rapid design development and testing for synthetic  
530 development, and is the first step in facilitating synthetic reconstruction (Santorelli et al., 2019). Further  
531 efficiency can be achieved by combining computational frameworks such as ours with machine learning  
532 algorithms (Briers et al., 2019). Algorithms could not only be trained to optimize parameters such as cell  
533 line, signaling network, and behavioral response, but could also incorporate subparameters such as:  
534 motility, proliferation, differentiability, juxtacrine and soluble morphogen signaling,  
535 mechanotransduction, adhesion, chemotaxis, and differentiation, to list a few. Such a framework would  
536 accelerate advances in synthetic biology on multiple fronts by expanding the breadth of testable designs,  
537 indicating directions for expansion within the current tool repertoire (e.g. lack of synthetic  
538 mechanotransduction), and revealing programs for targeted structures.

539 These frameworks and models will likely be employed as designed: for efficient rational design  
540 of a desired morphology. Therefore, “off-target” programs, programs that fail to yield a desired  
541 morphology, will inherently be viewed as less relevant compared to successful programs. Nonetheless,  
542 such “off-target” programs can still reveal unimagined structures alongside fundamental developmental  
543 rules. An interesting direction would be to utilize computational models to explore structures that can, but  
544 have yet to, exist. This was previously not possible due to the efforts required biologically, but is now  
545 feasible with computational models that can rapidly test programs and accurately reveal structures. In  
546 light of this possibility, we propose that computational models are not only methods for *identifying*  
547 potential programs for morphogenesis, but also methods for *proposing* programs for novel/unidentified  
548 structures.

549 We hope this is the first of many modular computational models and trust that with continued  
550 technological and biological advances each generation of model will improve computational performance.

551

552 **MOVIES**

553

554

555 **FIGURE LEGENDS**

556

557 **Fig. 1. Concepts underlying the computational model (See STAR Methods for details and**  
558 **generalized model).**

559 **(a)** On the left, representation of biological communication between cell pairs A and B. (A) cells express  
560 ligand (purple) and (B) cell express receptor (black). With contact (pink arrow), (B) cells receive signal  
561 (green) that triggers expression of the target gene. In the lower pair, the amount of ligands in cells A is  
562 higher, hence the signaling (green arrow) towards the target gene is stronger. On the right, the *in silico*

563 model shows a simplified representation of this process with parameters: ligand amount (L, purple  
564 boundary of *in silico* cells), surface area of contact ( $\Phi$ , pink), and net signal (S, green arrow). In the  
565 schematic, *in silico* cells are multi-pixel objects with different levels of ligand and shared surface area.  
566 The cell pair at the bottom has a higher level of communication compared to the upper pair due to both a  
567 higher ligand level ( $L_2 > L_1$ , shown as thicker border) and smaller surface area of contact ( $\Phi_2 > \Phi_1$ , 2  
568 pixels compared to 1). **(b)** Time evolution of target gene level in the receiving cell; cells A and B are first  
569 placed in contact for 100,000 steps of simulation to follow induction of target gene expression, and then  
570 moved far apart to stop signaling and follow decay of target gene. Two plots are shown for two different  
571 values of shared surface area  $\Phi$ , with  $\Phi_2 > \Phi_1$ ; all other parameters are constant.  
572 **(c)** Model representation of cell behavior state change. On the left, a sender cell (A) (purple) activates a  
573 receiver cell (B) (gray) to induce a target gene (green) that encodes for an effector protein. Over time, cell  
574 (B) accumulates target genes products, and at a certain threshold the effector gene product causes a cell  
575 state transition from (B) to (B'). To the right *in silico* representation of the state transition and  
576 communication relationship between cells (A), (B), and (B'). Orange curved arrows indicate state  
577 transitions. Corresponding ligand/receptor pairs indicate a communication channel from (A) to (B) that  
578 promotes the state change of (B) to (B'). **(d)** The graph shows the progression of target gene level over  
579 time for a (B) cell that is initially in contact with an (A) cell and is then isolated at 100,000 steps.  
580 Example thresholds for the excited state (5000 AU) and ground state transitions (2500AU) are shown as  
581 dotted horizontal lines. At the start, the (B) cell is in the basal state (black solid line), but when the target  
582 gene level passes the excited state threshold, (B) cell becomes a (B') cell. The (B') cell remains in the  
583 active state (green solid line) until target gene levels drop below the ground state threshold and reverts to  
584 (B) (line goes back to solid black).

585

586 **Fig. 2. The *in silico* two-layer is similar to the *in vitro* two-layer.**

587 **(a)** Biological implementation of two-layer circuit: diagram of (A) and (B) where (B) cells express GFP  
588 and E-cadherin in response to contact with (A). A cells constitutively express a blue fluorescent protein  
589 (BFP). Confocal fluorescent microscopy images, overlaid for green, blue and brightfield channels, at 1h  
590 after seeding of 100 (A) cells and 100 (B) cells and after 24h; images reproduced from (Toda et al., 2018).  
591 **(b)** *In silico* implementation of the two-layer circuit. (A) cells, when physically contacting (B) or (B')  
592 cells, send activation signal to (B) and (B') cells, which induces target gene. In (B) cells, accumulation of  
593 sufficient target gene excites them to the (B') state. Adhesion matrix defines pair-wise adhesion  
594 preference on a scale 0-3 (0 minimal adhesion preference, 3 high adhesion preference); with this adhesion  
595 matrix indicated that (B') cells are strongly adhesive to other (B') cells but weakly to other (B) or (A)  
596 cells. On the right, shown are simulation renderings of a typical temporal evolution from  $t=1,000$ mcs to  
597  $t=24,000$ mcs. For this instance, initial conditions are a mixture of 92 (A) and 87 (B) cells. Still images of a  
598 midpoint cross section of the aggregate at  $t=1,000$  and  $t=24,000$ mcs of representative simulation run are  
599 shown on the right. Scale bar is 17.5 pixels, approximately 100 $\mu$ m. **(c)** Cell type homogeneity over time,  
600 as a measure of sorting. In green, homogeneity index for cell type B (both B and B'), and in blue for cell  
601 type A. Solid lines are the mean, shaded areas represent standard deviation ( $n=3$ ). At around 7,000mcs the  
602 B cells accumulated enough target gene that allowed them to transition to B'. Time scale equivalence,  
603 1,000 monte carlo steps (mcs) to 1 hour, and size equivalence, 17.5 pixels to  $\sim 100\mu$ m, were obtained from  
604 images and movies of the *in vitro* three-layer structure (see Fig.3).

605

606 **Fig. 3. The computational model captures qualitative and quantitative features of the synthetic**  
607 **developmental trajectory for formation of three-layered spheroids.**

608 **(a)** Biological implementation of the back-and-forth network: cell A express constitutive BFP and CD19  
609 ligand (round ligand), and conditional to anti-GFP synNotch also mCherry and low levels of E-cadherin.

610 Cell B express anti-CD19 synNotch that triggers expression of high levels of E-cadherin and GFP-ligand.  
611 The two inductions happen sequentially over time when A cells and B cells are mixed together, such that  
612 CD19-antiCD19 interaction happens first (Step 1), and GFPlig-antiGFP happens second (Step 2), only  
613 after GFP ligand is produced in Step 1.

614 For synthetic developmental trajectory, the time evolution of a mixture of 200 (A) cells and 40 (B) cells is  
615 shown with overlay pictures of bright field, blue green and red channel from confocal microscopy  
616 imaging, reproduced from (Toda et al., 2018). For the Regeneration, initial seeding is with 160 (A) with  
617 80 (B); bisection was done with microguillotine, reproduced from (Toda et al., 2018).

618 **(b)** Computational implementation of back-and-forth network. (A) cells, when physically contacting (B)  
619 cells, send a signal (round ligand) to (B), which induces target gene. In (B) cells, accumulation of  
620 sufficient target gene excites them to (B') state. (B') cells become able to send a signal to cells (A)  
621 (square ligand), which initiate transition towards state A'. Adhesion matrix is shown on the right; it  
622 specifies that (A') cells are moderately adhesive to (B') green and weakly to other (A') red cells. All cells  
623 prefer binding to other cells than to media (black). Representative cross section of aggregates of an *in*  
624 *silico* synthetic developmental trajectory is shown below at the indicated time points; initial conditions  
625 are 200A cells and 50B cells. For the regeneration simulation, the initial condition is 24h timepoint of a  
626 synthetic development run started from 160A and 91B cells. Then, half of the cells were manually  
627 removed. Scale bar is 17.5 pixels (around 100um). Number of cells is approximate *in vitro*, and *in silico*  
628 is a feature that is not completely under control of the programming.

629 **(c)** Quantification of A' (red) and B' (green) activation *in silico* and *in vitro* followed over time for the  
630 duration of development of the three-layered structure. *In silico*, the activation index for A' cells is the  
631 number of activated cells over the total of A+A' cells normalized to be 100 at endpoint; similarly for  
632 activation index for B' cells. *In vitro* (solid lines), the activation index for A' cells is defined as the  
633 amount of green pixels, normalized to be 100 at the endpoint; similar for (see STAR methods, Video  
634 Analysis for details on thresholding) (n=30 simulations, n=1 for *in vitro*). We present mean±s.d. for the *in*  
635 *silico* results (dotted lines with standard deviations in the graph).

636 **(d)** Quantification of sphericity/circularity measures over the time development of synthetic and *in vitro*  
637 systems. In blue, all the cells are considered; in green only the activated (A') and (B') cells. Solid line is  
638 from *in vitro* measures; solid lines with shaded contours are from *in silico* measurements and represent  
639 mean and standard deviation interval respectively. *In silico* sphericity was rescaled to account for the  
640 cubic nature of the voxels (See STAR methods, Simulation quantifications for *in silico*, and Video  
641 Analysis for *in vitro* details). Vertical dashed line indicates time of (B') cells activation (n=30  
642 simulations, n=1 for *in vitro*).

643 **(e)** Quantification of the number of cores formed over repeated simulations (n=30 simulations, n=28 for  
644 *in vitro*). Cores *in silico* are defined as contiguous assemblages of at least 5 cells.

645

#### 646 **Fig. 4. The model captures the formation of various synthetic structures.**

647 (a) Gallery of different structures obtained *in vitro* (Toda et al., 2018) and the corresponding simulations.  
648 On top, the biological base framework (left) and the simulation network (right). They are the same for all  
649 4 structures shown below. For the *in vitro*, con.gene # denotes a constitutively expressed transgene;  
650 tar.gene # are the target genes, induced upon signaling. For each structure shown are (from left to right):  
651 biological gene matrix that explains the specific genes present in the cells; biological confocal picture at  
652 endpoint reproduced from (Toda et al., 2018); model simulation section of the spheroid at the same  
653 endpoint; model adhesion matrix. Scale bar is 100um for *in vitro* and 17.5 pixels (approx. 100um) for *in*  
654 *silico*. The colors red and blue of the last row in the *in vitro* system have been switched when compared to  
655 the image published in (Toda et al., 2018), for keeping the color consistent with the *in silico* and the other  
656 trajectories. See Fig. S4 and S5 for more examples.



657 (b) Lateral inhibition with adhesion. On the left are the biological diagrams and cell behaviors over time,  
658 reproduced from (Toda et al., 2018). Starting from uniform population of red cells, a two-layered  
659 structure is obtained with the lateral-inhibition differentiation into red cells and green cells, plus adhesion-  
660 mediated sorting due to green cells expressing high Ecadherin.  
661 On the right is the *in silico* version. (A) cells receive signal from neighboring (A) cells and send signal to  
662 neighboring (A) and (A') cells. The signals inhibit red color and activate green reporter. (A) cells, with  
663 sufficient red inhibition/green activation, excite to (A'). Schematics and adhesion matrix are shown  
664 above. Below, selected time points of a representative simulation run are shown. Scale bar is 17.5pixels  
665 =100um for *in silico*. See Fig. S6 for more details on lateral inhibition network.

666

667 **Fig. 5. *In silico*, hollow structures can be achieved via two layers + apoptosis.**

668 (a) Goal trajectory: start from an initial configuration of randomly mixed (B) gray and (A) blue cells,  
669 induction of (B) cells to (B') green, two-layer formation, and then cavitation.

670 (b) *In silico* network: the two-layer network is modified so that (B') cells can signal to (B) and (B') cells,  
671 facilitating the transition of (B) to (B') and (B') to medium M. Signal activates green color, representing  
672 green reporter associated to inducted ligand. A first threshold defines transition to (B'), a second, higher  
673 reporter threshold defines transition to medium M (see STAR methods for details). (B') cells neither grow  
674 nor divide. Adhesion matrix is shown on the right.

675 (c) Evolution over time of a representative simulation at the indicated time steps; shown are tilted cross  
676 section slices of the 3D aggregates.

677 (d) Proposed biological implementation of the *in silico* network. Compared to adhesion, ligand and  
678 growth arrest effectors, death effectors have a lower number of reporter sites (depicted as half-circles in  
679 the promoter cassette) and as such require higher threshold for induction.

680

681 **Fig. 6. The *in silico* model identifies strategies for elongated structures.**

682 (a) Goal trajectory: starting from a random mix of (A) gray and (B) blue cells, step 1 is formation of two  
683 poles, step 2 is activation of (A') red and (B') green cells at the interface, and step 3 is bidirectional  
684 elongation.

685 (b) *In silico* network. Signaling: (A) signals to (B) and vice versa via two independent channels (pointed  
686 and rounded ligands respectively); the signaling activates (A) to (A') red and (B) to (B') green after a  
687 threshold is reached. (A') red cells gain a new signaling capacity (triangular ligand) that can signal to  
688 other (A) cells as well. The same happens with (B') cells, which gain a squared ligand signaling capacity.

689 Adhesion: (A) and (B) cells are homotypically adhesive and therefore do not adhere to each-other. (A')  
690 and (B') are highly adhesive both homotypically and to each-other, as expressed in the adhesion matrix.  
691 Other effector changes in cells (A') and (B') are: stopping cell division and growth, and decreasing  
692 motility, to simulate fluid-to-solid transition.

693 (c) Simulation result when starting from 40 A cells and 40 B cells with Implementation 1 (see text for  
694 details); representative image of endpoint result from a total of 10 runs (see (f) for quantification);

695 (d) Results of simulations with same parameters as Implementation 1, but controlled initial conditions.  
696 Initial conditions are as shown on the left: (A) and (B) cells are initialized as two separate spheroids of 36  
697 inactivated cells each. Endpoint result of a simulation with the same parameters as Implementation 1,  
698 repeated n=10, average length=62.56±8.77 pixels

699 (e) Simulation results with Implementation 2 parameters, where activation threshold for transition A→A'  
700 and B→B' are higher. The elongation is slower but more robust.

701 (f) Quantification of length of simulated aggregates at 100,000 steps for Implementation 1 and  
702 Implementation 2. We present mean±s.d. (n=10). See Fig. S7 for details on how the length is measured.

703

704 **Fig. 7. Oscillating morphologies can be achieved *in silico* by inhibiting receptor expression.**

705 (a) Goal trajectory. Starting from randomly mixed A blue and B grey cells, a “limit cycle” is initiated: A  
706 and B cells are heterotypically adhesive, so they tend to maximize A-B contacts and form a checkerboard  
707 pattern; then (1), signaling between neighboring A and B cells induce them reciprocally to A’ and B’;  
708 since A’ and B’ cells are homotypically adhesive, they sort to form two poles (2); at this point, signaling  
709 between A’ and B’ is minimized so they revert back to their basal states A and B (3); since basal states  
710 are heterotypically adhesive they should favor formation of a checkerboard pattern (4), thus re-initiating  
711 the cycle.

712 (b) Adhesion matrix common to all the attempted simulations. A and B are heterotypically adhesive  
713 whereas A’ and B’ are homotypically adhesive. Numerical parameters are set equal for the (A) genotype  
714 compared to (B) genotype. Cells neither grow nor divide here, and  $\lambda_{\text{Sur}}$  and  $\lambda_{\text{Vol}}$  are slightly increased  
715 compared to other simulations (see STAR methods, for details).

716 Network 1. (A) cells signal to (B) cells to induce them to B’; reciprocally, B signals to A to induce a  
717 transition to A’. Induced states A’ and B’ maintain all the signaling and receiving capacity of the basal  
718 states. Induced states change their adhesion repertoire (see adhesion matrix) to switch from heterotypic to  
719 homotypic adhesion.

720 Network 2, Signaling network is same as Network 1 but now activated states lose signaling capacity;

721 Network 3, Signaling network is same as Network 1 but now activated states lose signal reception  
722 capacity.

723 (c) Morphological evolution over time. Starting from 30 A cells and 27 B cells, the development is  
724 followed for 100,000mcs. Overall structure is followed by measuring the mean of the homogeneity  
725 indexes  $\Psi_{B,B'}$  and  $\Psi_{A,A'}$  over time; it reflects the quality of both separated structures and mixed structures  
726 when the total number of cells is kept relatively constant (n=1 for each attempt). Inserts are images from  
727 the simulated development at the corresponding timepoints.

728

729

730 **STAR METHODS**

731

732 **KEY RESOURCES TABLE**

733

| REAGENT or RESOURCE                               | SOURCE                   | IDENTIFIER      |
|---------------------------------------------------|--------------------------|-----------------|
| Software and Algorithms                           |                          |                 |
| CompuCell3D (CC3D) v3.7.8                         | (Swat et al., 2012)      | RRID:SCR_003052 |
| Mathematica v11.3.0.0                             | Wolfram Research         | RRID:SCR_014448 |
| ImageJ v1.52a                                     | (Schneider et al., 2012) | RRID:SCR_003070 |
| JMP Pro v14.0.0                                   | SAS Institute            | RRID:SCR_014242 |
| Excel v1808                                       | Microsoft                | RRID:SCR_016137 |
| General Juxtacrine Signaling Model (GJSM) in CC3D | This paper               | N/A             |

734

735 **CONTACT FOR REAGENT AND RESOURCE SHARING**

736

737 Further information and requests for resources or code should be directed to and will be fulfilled by the  
738 Lead Contact, Leonardo Morsut ([Leonardo.Morsut@med.usc.edu](mailto:Leonardo.Morsut@med.usc.edu)).

739

740 **COMPUTATIONAL METHOD DETAILS**

741



## 742 CompuCell3D and the cellular Potts Formalism

743

744 We implemented our model in CompuCell3D (CC3D) v.3.7.8 (Swat et al., 2012), a modeling  
 745 software that allows simulation of cells and their behaviors using the cellular Potts formalism. By itself,  
 746 CC3D contains numerous built-in features for replicating *in vitro* cell behavior, several of which we  
 747 utilized either directly or adjusted via CC3D Python v.2.7.13 scripting according to manual v3.7.9. In our  
 748 model, we incorporated default features from CC3D such as surface area constraint, volume constraint,  
 749 cell division, adhesion, cell-cell surface contact, and cell types. We implemented custom cell motility, cell  
 750 growth, and cell signaling, as described below and in subsequent sections.

751 We defined cells as multi-pixel entities in 3D that physically act by performing “pixel copy  
 752 attempts” over simulation time steps (monte carlo steps, mcs). Performing “pixel copy attempts”  
 753 effectively moves and changes both cell geometry and position over time. These pixel copy attempts  
 754 succeed probabilistically, determined by the Boltzmann acceptance function,  $P=e^{-\Delta H/T}$ , where P is  
 755 probability of attempt success,  $\Delta H$  is change in total effective energy of the system from all attempted  
 756 pixel copy attempts at the mcs t, and T is the cell motility (Swat et al., 2012).

757 Effective energy (H). Because we incorporated surface area constraint, volume constraint, and  
 758 adhesion, our total effective energy H at a given mcs t therefore takes the form,

$$H = \sum_{i,j} J_{\sigma(i),\sigma(j)} (1 - \delta_{\sigma(i),\sigma(j)}) + \sum_{\sigma} (\lambda_{Sur}(\sigma)(Sur(\sigma) - Sur_{Tar}(\sigma))^2 + \lambda_{Vol}(\sigma)(Vol(\sigma) - Vol_{Tar}(\sigma))^2)$$

759 as described in (Hester et al., 2011). The terms  $\sigma(i)$  and  $\sigma(j)$  denote the identity of the cells occupying  
 760 pixel sites i and j separately, with the Kronecker Delta limiting inclusion to only the cell interface. J is a  
 761 matrix that contains the contact energy per pixel of the boundaries while  $\lambda_{Sur}$  and  $\lambda_{Vol}$  constrain deviations  
 762 of a cell from the ideal surface area  $Sur_{Tar}$  and  $Vol_{Tar}$ , hereafter referred to as target surface area and target  
 763 volume, respectively.

764 J controls adhesion in cellular Potts. J represents a stability index: lower J makes for a more stable  
 765 state, which is then how you achieve stronger adhesion. Conversely, a higher J leads to weaker adhesion.  
 766 Throughout the manuscript (mainly in the figures), we use a grouped representation of the adhesion for  
 767 presentation simplicity; the exact values of J are shown in Table S2.

### 768 Cell motility (T)

769 Cell adhesion to environment is complexly linked to cell motility, and adhesion effects on  
 770 motility vary widely between different adhesion proteins and cell types (Gumbiner, 1996; Nieman et al.,  
 771 1999; Takeichi, 2011). In general, although clearly not all-encompassing, the adhesion abstraction is that  
 772 strong cell adhesion to environment tends to decrease cell motility (Alberts et al., 2002; Gumbiner, 1996;  
 773 Takeichi, 2011). We therefore defined motility as a function of a cell’s environment (neighboring cells  
 774 and medium); so different cells can have different motility. Each cell’s individual motility  $T_{\sigma}$  is:

775

$$T_{\sigma} = T_0 + \zeta \frac{\sum_{\sigma(i),i,j} J_{\sigma(i),\sigma(j)} (1 - \delta_{\sigma(i),\sigma(j)})}{Sur(\sigma)}$$

776 This formula iterates over each neighboring cell pixel and medium uniquely, but ultimately only the focal  
 777 cell type, neighboring cell types, and total contact with medium determine motility because J differs only  
 778 between types and is constant to medium. Categorizing environment by cell types and medium instead,  
 779 accomplished in CC3D via cell-cell surface contact feature and cell type index, we obtained a  
 780 computationally simpler approximate formula,

$$T_{\sigma} = T_0 + \zeta \frac{\sum_k J_{type(\sigma),k} * total\ contact\ surface\ area\ with\ k}{Sur(\sigma)}$$

781  $T_0$  is a constant representing basal cell motility,  $\zeta$  a constant representing how effectual adhesion is at  
782 attenuating, and  $k$  denotes cell type (including medium here). This  $T$  allows each cell to sense its local  
783 environmental adhesiveness, decreasing motility if adhesive to neighbors and restoring motility when  
784 exposed to non-adhesive conditions.

785

### 786 In Silico L929 Cell Line Properties

787

788 In our model, each *in silico* L929 (ISL929) cell consists of multiple pixels and starts with a target  
789 radius (TR) randomly chosen using a Gaussian distribution ( $\mu=3.0$  pixels,  $\sigma=0.5$  pixels). This TR is then  
790 used to calculate the target surface area ( $4\pi r^2$ ) and target volume ( $4\pi r^3/3$ ) for each cell, as *in vitro* L929  
791 cells adopt a spherical shape when in suspension (Toda et al., 2018). Each cell then undergoes growth by  
792 experiencing net positive increase in TR from small positively skewed uniformly distributed fluctuations  
793 in TR. Target surface area and target volume thus increase slowly over time. Upon reaching a threshold  
794 volume,  $2*4\pi\mu^3/3$ , the cell then undergoes division, resulting in the original cell and a new cell. The  
795 original cell is subsequently reassigned a new TR from the above Gaussian distribution and both target  
796 surface area and target volume are recalculated. The new cell is assigned the same post-division  
797 parameters as the original cell.

798 *In vitro* L929 mouse fibroblasts weakly adhere to one another under ultra-low attachment  
799 suspension conditions (Toda et al., 2018) thus we designate our ISL929 cells to have a relatively high  $J$  to  
800 one another and a slightly higher  $J$  to the medium, resulting in the formation of weak aggregates in  
801 medium. As a result, these ISL929 cells also bear high motility, again similar to *in vitro* L929 (Persson et  
802 al., 2010; Toda et al., 2018).

803 With the Potts model and growth model, we generated ISL929 cells with reasonable resemblance  
804 to *in vitro* L929 cells, favoring a rounded morphology, growing, roughly doubling in 24000 mcs (24  
805 hours as estimated in (Toda et al., 2018)) being highly motile, and, when non-adhesive, forming non-  
806 compact aggregates with one another in suspension (Toda et al., 2018). Additionally, due to our stochastic  
807 implementation of growth, cell death occurs as well, incorporating yet another behavior of *in vitro* L929  
808 cells. We also observed from the reference experiments that strongly adhesive L929 cells tightly cluster,  
809 deform markedly, and lose their rounded morphology (Toda et al., 2018). To roughly mimic this  
810 characteristic of adhesive L929 cells in our simulations, we relaxed the spherical morphology constraint  
811 such that for cells with an adhesion matrix value of at least 2 (see Table S2),  $\lambda_{Sur}$  and  $\lambda_{Vol}$  were set to 1.0.  
812 Other cells had  $\lambda_{Sur}$  and  $\lambda_{Vol}$  set to 2.2.

813 In our hollowing, elongation, and oscillation simulations, we modify some of these basic  
814 parameters to incorporate new behaviors and if so, give the changes in the respective sections.

815

### 816 Generalized Juxtacrine Signaling Model (GJSM)

817

818 Juxtacrine signaling is the method employed to achieve the known synthetic structures. For a  
819 generic signaling ligand whose expression was constitutive, constant, and unaffected by signaling, we  
820 describe the total ligand level,  $L$ , on a cell's surface by the equation

$$821 \text{General: } L = \frac{\gamma}{\eta + e^{-(t-\theta)/\xi}} \quad (1a)$$

$$822 \text{Model Simplified: } L = \frac{\gamma}{1 + e^{-t/\xi}} \quad (1b)$$

823 where  $t$  is the given time in mcs, while  $\gamma$ ,  $\eta$ ,  $\theta$ , and  $\xi$  are constants. We chose this equation because of its  
824 generalizability. It can represent steady state ligand level on a cell's surface, recovery of surface ligand  
825 level from trypsinization, and experimental conditions such as ligand induction via tetracycline from a  
826 drug-controlled promoter (e.g. Tet On). Here we also give the simplified form used in our simulations.

827 Then, a receiver cell in contact with the sender cell would change its reporter level, R, by the  
 828 differential equation

829 
$$\text{General: } \frac{dR}{dt} = \frac{\tau}{\alpha + e^{-(S-\beta)/\varepsilon}} - \frac{R}{\kappa} \quad (2a)$$

830 
$$\text{Model Simplified: } \frac{dR}{dt} = \frac{1}{1 + e^{-(S-\beta)/\varepsilon}} - \frac{R}{\kappa} \quad (2b)$$

831 where  $\tau$ ,  $\alpha$ ,  $\beta$ ,  $\varepsilon$ , and  $\kappa$  are constants and S is signal strength. We chose this form for several reasons. First,  
 832 parameters have intuitive interpretations:  $\tau$  and  $\alpha$  control maximal reporter synthesis due to S,  $\beta$  controls  
 833 sensitivity to S,  $\varepsilon$  modulates magnitude of S and  $\beta$ , and  $\kappa$  represents the standard linear protein decay rate  
 834 constant commonly employed in biological models. Secondly, these parameters have kinetic/biological  
 835 interpretations, due to the logistic function's intrinsic relation to the Hill function (Reeve and Turner,  
 836 2013). Lastly, the logistic function is easily tunable and well behaved, due to its monotonicity from  
 837 negative infinity to positive infinity and bound between 0 and  $\tau$ . This tunability is not as easily achievable  
 838 with the Hill function, where odd or fractional hill constants lead to the existence of singularities.

839 Signal strength S is affected by four primary factors in juxtacrine signaling: the number of  
 840 receptors on the receiver cell, the number of ligands on each sender cell, the surface contact area between  
 841 the sender and receiver cell, and the number of sender cells in contact. For a receiver cell  $\sigma$  with receptor  
 842 level  $\Omega$  and signaling neighbors SN this allows S to be defined as,

843 
$$\text{General: } S_{\sigma} = \sum_{SN} \text{Min}[\Phi_{SN} * L, \Phi_{\sigma} * \Omega] \quad (3)$$

844 where  $\Phi$  and  $L/\Omega$  are the separate components reflecting surface contact fraction and ligand/receptor  
 845 level, respectively. The Min function takes the minimum of the two values. Then, we define

846 
$$\Phi_{SN} = \frac{\text{contact surface area with SN}}{\text{Sur (SN)}} \quad (4a)$$

847 
$$\Phi_{\sigma} = \frac{\text{contact surface area with SN}}{\text{Sur } (\sigma)} \quad (4b)$$

848 The receiver cell thus receives a signal strength S as a function of both the ligand amount (L) present on a  
 849 sender cell, the number of receptors ( $\Omega$ ) present on the receiver cell, and the surface area shared  $\Phi$  with  
 850 each sender cell, iterated over all neighboring sender cells. The model assumes homogeneity of ligand  
 851 and receptor on the cell's surface.

852 In our biological replication simulations, we assumed the receptors are non-limiting (i.e. ligand  
 853 induction or signaling mediated ligand inhibition), and in our exploration simulations, we utilized the case  
 854 where receptor is limiting (i.e. signaling mediated receptor inhibition). We thus obtain

855 
$$\text{Ligand Limiting Model Simplified: } S_{\sigma} = \sum_{SN} \Phi_{SN} * L \quad (5a)$$

856 
$$\text{Receptor Limiting Model Simplified: } S_{\sigma} = \sum_{SN} \Phi_{\sigma} * \Omega \quad (5b)$$

857 Because these factors evolve over time, S is therefore a morphological dependent and time dependent  
 858 function that evolves according to structure's spatial organization.

859 Some cell types send and receive signals. These cells have reporters that also function as, or are  
 860 associated with, signaling ligands. For these cells, we set

861 
$$\text{General and Model Simplified: } L = R \quad (6)$$

862 By assigning different combinations of these equations to *in silico* cells, we can generate different  
 863 genotypes of cells. In CC3D, these different genotypes are coded as different cell types. To match the  
 864 biological ligand receptor pair specificity, we set different types of cells to receive signal only from  
 865 designated types of cells, reflecting the lack of cross-activation by synNotch (Toda et al., 2018). Thus, a  
 866 neighboring cell that expresses a ligand L on its surface sends signal only to a neighboring cell with the  
 867 cognate receptor. Likewise, a cell with receptor  $\Omega$  can only receive signal from a cognate ligand  
 868 expressing cell.

869  
 870 Quantized Signaling Inducible Output

871

872 To implement signaling inducible behavioral response, we further classify our cell signaling  
873 genotypes into states. We borrow notation from physics; cells of each genotype, if excitable, bear a  
874 ground state and an excited state or even multiple higher order excited states. Cells that pass the threshold  
875 would enter the excited state, with the excited state bearing different properties, such as color change,  
876 being adhesive, capacity to deform, or even different signaling/reception capacity (Fig. 1b). This  
877 quantized representation of cell behavior has been applied to great effect, though not with this notation, in  
878 other models (Anderson, 2005; Hester et al., 2011; Hutson et al., 2017).

879 Because the reference experiments primarily focus on signaling inducible adhesion with reporter,  
880 we utilize two states per genotype, ground and excited, in the biological replication simulations. The  
881 excited state bears a different color from the ground state, reflecting signaling induced reporter  
882 expression.  $J$  changes depending on adhesive strength and binding specificity that the cadherin types in  
883 the *in vitro* counterpart express upon sufficient signaling (see Table S1). It is also possible for a cell to fall  
884 from the excited state to the ground state due to loss of signaling, leading to the existence of a reversion  
885 threshold, in contrast to the activation threshold. Falling under the reversion threshold transitions an  
886 excited state cell to the ground state, reverting color and excited properties. It is of interest to note that for  
887 the reference experiments, the activation threshold need not necessarily equal the reversion threshold, as  
888 the adhesion protein and reporter can have different degradation rates since they are not fused. We tested  
889 both cases where the reversion threshold is zero and activation threshold equals the reversion threshold.  
890 We did not detect a clear difference between the two methods (See Results, Fig. 3, and Fig. S3). We  
891 therefore based our decision on the reference results, where no notable deactivation and loss of adhesion  
892 occurred (Toda et al., 2018) and thus set our reversion threshold to be zero in our replication simulations.  
893 In our hollowing, elongation, and oscillation simulations, we conjugated signaling to other types of  
894 output, such as changes in motility, growth, and tested the effect of different thresholds. This led to  
895 additional behavior differences between genotypes, their ground states, and their excited states. We give  
896 these changes in the respective sections.

## 897 Simulation Conditions

899 Our simulations employed two genotypes, usually both excitable, with the following notation: (A)  
900 as ground state of the first genotype, (A') as excited state of the first genotype, (B) as ground state of the  
901 second genotype, and (B') as excited state of the second genotype. We generated these genotypes in our  
902 replication simulations by programming ISL929 with the appropriate signaling network and behavioral  
903 response when excited (adhesion and/or color change), reflecting that of the *in vitro* counterpart. At the  
904 center of a 100x100x100 lattice, we seeded a mixture of (A) and (B) cells as a radially symmetric blob to  
905 maintain a consistent initial cell aggregate shape while also maintaining a similar cell total and ratio to  
906 that of the reference experiment. We then ran the simulation according to the timescale, 1000 monte carlo  
907 steps (mcs) per one hour of experiment time. Our timescale was determined by comparing the qualitative  
908 and quantitative space-time morphological evolution, and (A') and (B') activation rate, to that of the  
909 reference three-layer experiment (Fig. 3d-e).

911 We ran lateral inhibition patterning on a 100x100x5 pixel cell monolayer (~400 cells) for 20,000  
912 mcs. Cells in inhibition networks (Fig. 4b, Fig. 7, Fig. S6, and Fig. S8) began with a nonzero reporter as  
913 per reference experiment or as stipulated according to designed circuit.

## 915 **QUANTIFICATION AND STATISTICAL ANALYSES**

### 917 Simulation Quantifications

918

919 To determine how our simulations quantitatively compared to experimental runs for the three-  
920 layer structure, we quantified three measurements: core distribution, sphericity, and activation timescale.  
921 (B') green cells were visualized in 3D to determine core amounts and counted for each simulation at the  
922 endpoint. Sphericity was measured over time, both for excited states and over all states (Fig. 3d), using  
923 the formula (Cruz-Matías et al., 2019; Wadell, 1932)

$$924 \quad Sphericity = \frac{\pi^{\frac{1}{3}} (6 * Structure Volume)^{\frac{2}{3}}}{Structure Surface Area}$$

925 We roughly rescaled the sphericity by dividing by 0.48 to compensate for the cubic nature of the voxels.  
926 We measured activation timescale by measuring the number of (B') and (A') cells present per timestep  
927 and normalized each to 1 maximum.

928 We were also interested in the detailed spatial morphogenesis of these structures over time, thus  
929 we developed and quantified homogeneity degree  $\Psi$  per cell type  $x$ , calculated according to the formula  
930 below

$$931 \quad \Psi_x = \frac{\sum_{\sigma_x} \frac{contact\ surface\ area\ with\ x}{Sur(\sigma)}}{total\ cells\ of\ x\ in\ contact\ with\ x}$$

932 This measure ranges from 0 to 1, with 1 indicating maximal homogeneity, and is similar to sorting  
933 measurements employed in other studies (Flenner et al., 2008; Olimpio et al., 2018; Sun and Wang,  
934 2013). Our measure has several additional desirable properties, the first being the ability to generalize  
935 beyond two cell types. In our simulations, we separate over each genotype (A vs B) and measure  $\Psi_{A,A'}$   
936 and  $\Psi_{B,B'}$  to distinguish quality of structural homogeneity due to each genotype. If desired, this measure  
937 can be simply extended to the ground and excited states of each genotype as well,  $\Psi_A$ ,  $\Psi_B$ ,  $\Psi_{A'}$ ,  $\Psi_{B'}$ , or  
938 condensed as desired,  $\Psi_{A,A',B,B'}$ , making it possible to distinguish the effects of different behaviors on  
939 morphogenesis. Second, our measure can be applied to many different morphologies, beyond fixed  
940 lattices (Olimpio et al., 2018) and spherical, their spatial organization over time, and is insensitive to  
941 single cells isolated from the focal structure.

942 Finally, to compare our elongated structures, we additionally measured the elongation length by  
943 estimating each length of the linear segments comprising the structure. Each length was calculated as the  
944 distance between the endpoints of each linear segments. Then, the sum of all linear segments per structure  
945 represents the elongation of each structure (Fig. S7).

## 946 Video Analysis

947 *In vitro* data was either provided in the reference paper or obtained by analyzing the  
948 supplementary video for the counterpart structure from the reference experiments (Toda et al., 2018). The  
949 video was split into constituent frames using Mathematica v11.3.0.0, then circularity analyzed by drawing  
950 a region of interest around the structure using ImageJ v1.52a, both in bright field (all cells) and merged  
951 color field (activated cells only), and data collated in Microsoft Excel v1808. Circularity was then  
952 calculated using the classic equation

$$953 \quad Circularity = \frac{4 \pi Area}{Perimeter^2}$$

954 To estimate how fast cells activated over time, we color separated the green, red, and black  
955 merged image portion of each frame by green and red to generate two sets of frames, one for green and  
956 one for red, representing respectively the activated cells of (B) and (A). We then converted these frames  
957 into binary images using the MorphologicalBinarize function in Mathematica, replacing pixels with an  
958 intensity above 0.1 with pixels of intensity 1. This threshold value was minimally low to remove non-  
959 cellular background fluorescence and prevent biasing activated cell detection. Binarization additionally  
960 facilitated comparison by splitting *in vitro* cells into discrete states. Totaling the pixel intensity for each  
961



962 frame of each set estimates activation per timepoint for (B) and (A). Cellular background fluorescence,  
963 due to a few cells beginning with some green/red (Toda et al., 2018) was removed by subtracting the  
964 minimum background fluorescence of the time series. Using the minimum helped negate cellular  
965 background fluorescence with again minimal biasing of activated cell detection. This yielded two  
966 estimated activation curves over time, one for green and one for red, and each was then normalized to 1  
967 maximum.

## 968 Statistical Analyses

969 Sample sizes are given in the text and/or figure caption. Statistical tests were performed in JMP  
970 PRO v14.0.0 with a significance level of 0.05. We performed a chi-squared analysis for our core  
971 distribution analyses (Fig. 3c and Fig. S3b). We performed a matched t-test between average (A) cell  
972 surface area and average (A') cell surface area per lattice, with 10 lattice replicates, for our inhibition  
973 signaling cell monolayer patterning (Fig. S6b bottom right). We performed a standard two-tailed t-test for  
974 comparing the lengths of elongation for Fig. 6f. Appropriate test was chosen according to data type and  
975 assumptions tested by residuals analysis. We report and show mean  $\pm$ s.d. for all measures.  
976  
977  
978

## 979 **DATA AND SOFTWARE AVAILABILITY**

980 All simulations were performed in CompuCell3D v3.7.8 with custom scripts coded in Python  
981 v2.7.13.  
982  
983

## 984 **SUPPLEMENTAL INFORMATION**

985 Fig. S1. Additional three-layer structures and their sorting dynamics.

986 (a) Biological back-and-forth network that leads to the formation of the three-layer structures and model  
987 implementation.

988 (b) *In vitro* structure from 200 (A) and 40 (B) as reference (Toda et al., 2018). Two additional structures  
989 from replicate simulations starting from a mixture of  $202.2 \pm 4.33$  (A) and  $48.8 \pm 4.33$  (B) are given.  $\Psi_{B,B'}$   
990 and  $\Psi_{A,A'}$  are used to measure system sorting. We present mean  $\pm$ s.d.. (n=30 simulations).  
991

992 (c) *In vitro* structure from 160 (A) and 80 (B) as reference (Toda et al., 2018). Two additional structures  
993 from replicate simulations starting from a mixture of  $162.8 \pm 7.54$  (A) and  $87.2 \pm 7.54$  (B) is given.  $\Psi_{B,B'}$   
994 and  $\Psi_{A,A'}$  are used to measure system sorting. We present mean  $\pm$ s.d.. (n=10 simulations).  
995

996 Fig. S2. Activation from signaling is required for three-layer formation.

997 (a) Network is disrupted so that (A) and (B) cells no longer signal and thus cannot excite one another to  
998 their respective activated state. Adhesion matrix remains unchanged, only signaling is disrupted, and is  
999 analogous to treatment with DAPT, which inhibits synNotch mediated signaling (Toda et al., 2018).

1000 (b) Lack of structure formation starting from  $201.33 \pm 6.02$  (A) and  $49.67 \pm 6.02$  (B) due to loss of signaling  
1001 that drives cadherin mediated sorting. Quantitatively, no cores form, no activation dynamics occur, no  
1002 sorting occurs, but the structure still adopts an overall spherical shape, similar to the spheroids obtained *in*  
1003 *vitro* under DAPT treatment (Toda et al., 2018). We present mean  $\pm$ s.d.. Two structures from replicate  
1004 simulations shown. (n=30 simulations, n=1 *in vitro* experiment).  
1005

1006 Fig. S3. There is no detectable difference in setting the ground state/deactivation threshold equal to the  
1007 excited state/activation threshold and zero.



1008 A and B cells initial communicate via ligand-receptor binding. They communicate back and forth until a  
1009 threshold (same for both A and B?) is reached and they become either A' or B' cells, respectively. In the  
1010 absence of ligand-receptor binding, A' and/or B' cells can revert to their previous state.

1011 (a) Same code to obtain the three-layer structure in Fig. S1b and Fig. 3a. The only change is the  
1012 deactivation/ground state threshold is set equal to the activation/excited state threshold.

1013 (b) No detectable quantitative difference. We obtain a nonsignificant difference in core distribution from  
1014 the *in vitro* core distribution (Toda et al., 2018) and obtain dynamics similar to *in vitro* dynamics as well.  
1015 Structures are also qualitatively indistinguishable from simulated structures using the primary parameter  
1016 set. We present mean±s.d.. Two structures from replicate simulations shown alongside reference (Toda et  
1017 al., 2018) (n=30 simulations with initial mixture of 201.9±4.95 (A) and 49.1±4.95 (B), n=1 *in vitro*  
1018 experiment).

1019

1020 Fig. S4. Additional structures for the symmetric structures (first two) in Fig. 4 gallery.

1021 (a) Biological base framework and the simulation network common to the structures below.

1022 (b) Two additional structures from replicate simulations of the first structure in Fig. 4 gallery. We also  
1023 give the sorting dynamics as well as the time development. We present mean±s.d.. (n=10 simulations with  
1024 initial mixture of 89.7±10.78 (A) and 89.3±10.78 (B), *in vitro* 100 (A) and 100 (B) (Toda et al., 2018)).

1025 (c) Two additional structures from replicate simulations of the second structure in Fig. 4 gallery. We also  
1026 give the sorting dynamics as well as the time development. We present mean±s.d.. (n=10 simulations with  
1027 initial mixture of 202.2±4.49 (A) and 48.8±4.49 (B), *in vitro* 200 (A) and 40 (B) (Toda et al., 2018)).

1028

1029 Fig. S5. Additional structures for the asymmetrical structures (last two) in Fig. 4 gallery.

1030 (a) Biological base framework and the simulation network common to the structures below.

1031 (b) Two additional structures from replicate simulations of the third structure from 100 (A) and 100 (B) in  
1032 Fig. 4 gallery (Toda et al., 2018). We also give the sorting dynamics as well as the time development. We  
1033 present mean±s.d.. (n=10 simulations with initial mixture of 89.7±10.78 (A) and 89.3±10.78 (B)).

1034 (c) Smaller biological structures from the third structure of Fig. 4 gallery, but with 30 (A) and 30 (B)  
1035 (Toda et al., 2018), and the analogous simulated structures starting from 27.1±3.07 (A) and 29.9±3.07  
1036 (B). Our model captures variability in structure formation in more than just the three-layer structure. We  
1037 present mean±s.d.. (n=10 simulations).

1038 (d) Two additional structures from replicate simulations of the fourth structure in Fig. 4 gallery. We also  
1039 give the sorting dynamics as well as the time development. We present mean±s.d.. (n=10 simulations with  
1040 initial mixture of 163.4±7.63 (A) and 87.6±7.63 (B), *in vitro* 160 (A) and 80 (B) (Toda et al., 2018)).

1041

1042 Fig. S6. The model captures inhibitory signaling to recapitulate well known patterns.

1043 (a) Synthetic implementation of lateral inhibition (Toda et al., 2018).

1044 (b) Checkerboard patterning. The model can capture the classic checkerboard patterning resulting from  
1045 lateral inhibition, resulting in a typical red interspersed with green pattern (left drawing). Beginning with  
1046 a fixed (A) cell monolayer (no differential adhesion, cells are constant in morphology, no growth,  
1047 division, and motion), fates bifurcate to yield the classic checkerboard patterning (top right). On a  
1048 disorganized cell (A) monolayer, no differential adhesion, cells still do not grow nor divide, but can  
1049 slightly move and vary in size naturally (before fate bifurcation occurs). We found that smaller cells are  
1050 more likely to take the red (Notch) fate while larger cells tend to be (Delta) green fate. (n=10 cell  
1051 monolayers, one shown on bottom right).

1052 (c) Two additional structures from replicate simulations of the lateral inhibition structure in Fig. 4b. We  
1053 give the sorting dynamics and *in vitro* structure from 100 (A) as reference (Toda et al., 2018). We present  
1054 mean±s.d.. (n=10 simulations with initial mixture of 93 (A)).

1055  
1056  
1057  
1058  
1059  
1060  
1061  
1062  
1063  
1064  
1065  
1066  
1067  
1068  
1069  
1070  
1071  
1072  
1073  
1074  
1075  
1076  
1077  
1078  
1079  
1080  
1081  
1082  
1083  
1084  
1085  
1086

Fig. S7. Measuring length of structure for various elongation programs. We measured the length of the elongated structure by dissecting the structure into multiple linear portions, then estimated coordinates of the endpoints of the line traversing through the center of each portion. In this example, we split the structure into two linear portions with a line each. The coordinates of the endpoints of the line can be found via the cross-sectional slices, requiring 3 slices (a,b,c) in this example. Summing the length of each line estimates the overall length of the elongated structure. We focused only on the elongation from activated (A') and (B') cells.

Fig. S8. Potential biological versions of the oscillation structures.

(a) Possible biological implementation for each network.

(b) Sorting dynamics. Measuring mean of  $\Psi_{B,B'}$  and  $\Psi_{A,A'}$  indicates the oscillation consists of high mixing and low mixing structural switching as designed and remains stable for at least 300,000 simulation steps.

|            | AC Hi.Ecad | BL Hi.Ecad | AC Ecad | BL Ecad | AC Lo.Ecad | BL Lo.Ecad | AC Ncad | BL Ncad | AC Pcad | BL Pcad | C.Pcad |
|------------|------------|------------|---------|---------|------------|------------|---------|---------|---------|---------|--------|
| AC Hi.Ecad | 20         | 40         |         |         | 35         | 49         |         |         |         |         | 40     |
| BL Hi.Ecad |            | 45         |         |         | 40         | 49         |         |         |         |         | 42     |
| AC Ecad    |            |            | 25      | 42      |            |            |         |         | 33      | 45      |        |
| BL Ecad    |            |            |         | 47      |            |            |         |         | 45      | 49      |        |
| AC Lo.Ecad |            |            |         |         | 40         | 49         |         |         |         |         |        |
| BL Lo.Ecad |            |            |         |         |            | 49         |         |         |         |         |        |
| AC Ncad    |            |            |         |         |            |            | 35      | 42      | 49      | 49      | 49     |
| BL Ncad    |            |            |         |         |            |            |         | 47      | 49      | 49      | 49     |
| AC Pcad    |            |            |         |         |            |            |         |         | 35      | 42      |        |
| BL Pcad    |            |            |         |         |            |            |         |         |         | 47      |        |
| C.Pcad     |            |            |         |         |            |            |         |         |         |         | 43     |

1087 Table S1: Adhesion parameters utilized in the model. Due to the definition of contact energy in CC3D,  
 1088 the larger the value, the lower the adhesion interaction. Adhesion parameters are related to the type of  
 1089 cadherin the cell expresses and two parameters exist per cadherin due to the step-wise approximation  
 1090 (ground state and excited state) in the model. Notation AC denotes increased cadherin levels due to  
 1091 activation and BL denotes baseline cadherin levels due to basal promoter activity. Hi. denote high  
 1092 expression, Lo. denotes low expression, and C. denotes constitutive expression per (Toda et al., 2018).  
 1093

| Adhesion Value (appears in matrix J) | Adhesion value (appears in Figures) |                       |
|--------------------------------------|-------------------------------------|-----------------------|
|                                      |                                     | 1094                  |
|                                      |                                     | 1095                  |
| 49                                   | 0                                   | Lowest adhesion 1096  |
| 48-40                                | 1                                   | 1097                  |
|                                      |                                     | 1098                  |
| 39-30                                | 2                                   | 1099                  |
|                                      |                                     | 1100                  |
| 29-20                                | 3                                   | 1101                  |
|                                      |                                     | 1102                  |
| 19-10                                | 4                                   | 1103                  |
|                                      |                                     | 1104                  |
| 9-0                                  | 5                                   | Highest adhesion 1105 |

1105 Table S2: Representation of adhesion values in the adhesion matrix. Adhesion values are grouped  
 1106 according the range above to simplify representation. 0 is the lowest, representing lack of cadherin  
 1107 mediated adhesion and 5 is the highest, representing very strong adhesion.  
 1108  
 1109  
 1110  
 1111  
 1112  
 1113

1114

1115

## 1116 **ACKNOWLEDGEMENTS**

1117

1118 The authors are grateful to the developers of CompuCell3D and the users of the help forum for their  
1119 assistance in learning the program. The authors would also like to thank Dr. Matt Thomson, members of  
1120 the Thomson lab, members of the Morsut lab, and members of USC's stem cell department for feedback  
1121 that improved the model. This project was supported by a National Institute of Biomedical Imaging and  
1122 Bioengineering R00 to LM (4R00EB021030-03) along with a USC Department of Stem Cell Biology and  
1123 Regenerative Medicine Startup Fund.

1124

## 1125 **AUTHOR CONTRIBUTIONS**

1126

1127 Conceptualization: C.L., L.M.; Methodology: C.L., L.M.; Software: C.L.; Validation: C.L.; Formal  
1128 Analysis: C.L.; Investigation: C.L.; Resources: L.M.; Data Curation: C.L.; Writing - Original Draft: C.L.,  
1129 L.M.; Writing – Review and Editing: C.L., L.M.; Visualization: C.L., L.M.; Supervision: L.M.; Project  
1130 Administration: L.M.; Funding Acquisition: L.M.

1131

## 1132 **DECLARATION OF INTERESTS**

1133

1134 L.M. is a co-inventor of synNotch, which was licensed to Cell Design Labs (acquired by Gilead), and  
1135 receives royalty payments for this from UCSF.

1136

## 1137 **REFERENCES**

1138

1139 del Álamo, D., Rouault, H., and Schweisguth, F. (2011). Mechanism and Significance of cis-Inhibition in  
1140 Notch Signalling. *Curr. Biol.* *21*, R40–R47.

1141 Alberts, B., Johnson, A., Lewis, J., Raff, M., Roberts, K., and Walter, P. (2002). *Molecular Biology of the*  
1142 *Cell* (Garland Science).

1143 Anderson, A.R.A. (2005). A hybrid mathematical model of solid tumour invasion: the importance of cell  
1144 adhesion. *Math. Med. Biol. A J. IMA* *22*, 163–186.

1145 Baeumler, T.A., Ahmed, A.A., and Fulga, T.A. (2017). Engineering Synthetic Signaling Pathways with  
1146 Programmable dCas9-Based Chimeric Receptors. *Cell Rep.* *20*, 2639–2653.

1147 Barnea, G., Strapps, W., Herrada, G., Berman, Y., Ong, J., Kloss, B., Axel, R., and Lee, K.J. (2008). The  
1148 genetic design of signaling cascades to record receptor activation. *Proc. Natl. Acad. Sci.* *105*, 64 LP – 69.

1149 Bashor, C.J., Horwitz, A.A., Peisajovich, S.G., and Lim, W.A. (2010). Rewiring Cells: Synthetic Biology  
1150 as a Tool to Interrogate the Organizational Principles of Living Systems. *Annu. Rev. Biophys.* *39*, 515–  
1151 537.

1152 Belmonte, J.M., Clendenon, S.G., Oliveira, G.M., Swat, M.H., Greene, E. V, Jeyaraman, S., Glazier, J.A.,  
1153 Bacallao, R.L., and Edelstein-Keshet, L. (2016). Virtual-tissue computer simulations define the roles of  
1154 cell adhesion and proliferation in the onset of kidney cystic disease. *Mol. Biol. Cell* *27*, 3673–3685.

1155 Bosenberg, M.W., and Massagué, J. (1993). Juxtacrine cell signaling molecules. *Curr. Opin. Cell Biol.* *5*,  
1156 832–838.

- 1157 Briers, D., Ashley R.G., L., Haghghi, I., Joy, D.A., Conklin, B.R., Belta, C., and McDevitt, T.C. (2019).  
1158 Self-Organized Pluripotent Stem Cell Patterning by Automated Design. *Cell Syst. Sneak Peek*.
- 1159 Brodland, G.W., and Chen, H.H. (2000). The Mechanics of Heterotypic Cell Aggregates: Insights From  
1160 Computer Simulations. *J. Biomech. Eng.* *122*, 402–407.
- 1161 Cohen, M., Georgiou, M., Stevenson, N.L., Miodownik, M., and Baum, B. (2010). Dynamic Filopodia  
1162 Transmit Intermittent Delta-Notch Signaling to Drive Pattern Refinement during Lateral Inhibition. *Dev.*  
1163 *Cell* *19*, 78–89.
- 1164 Collier, J.R., Monk, N.A.M., Maini, P.K., and Lewis, J.H. (1996). Pattern Formation by Lateral Inhibition  
1165 with Feedback: a Mathematical Model of Delta-Notch Intercellular Signalling. *J. Theor. Biol.* *183*, 429–  
1166 446.
- 1167 Conklin, B.R., Hsiao, E.C., Claeysen, S., Dumuis, A., Srinivasan, S., Forsayeth, J.R., Guettier, J.-M.,  
1168 Chang, W.C., Pei, Y., McCarthy, K.D., et al. (2008). Engineering GPCR signaling pathways with  
1169 RASSLs. *Nat. Methods* *5*, 673–678.
- 1170 Cruz-Matías, I., Ayala, D., Hiller, D., Gutsch, S., Zacharias, M., Estradé, S., and Peiró, F. (2019).  
1171 Sphericity and roundness computation for particles using the extreme vertices model. *J. Comput. Sci.* *30*,  
1172 28–40.
- 1173 Daringer, N.M., Dudek, R.M., Schwarz, K.A., and Leonard, J.N. (2014). Modular Extracellular Sensor  
1174 Architecture for Engineering Mammalian Cell-based Devices. *ACS Synth. Biol.* *3*, 892–902.
- 1175 Davies, J. (2017). Using synthetic biology to explore principles of development. *Development* *144*, 1146  
1176 LP – 1158.
- 1177 Elowitz, M., and Lim, W.A. (2010). Build life to understand it. *Nature* *468*, 889–890.
- 1178 Elowitz, M.B., and Leibler, S. (2000). A synthetic oscillatory network of transcriptional regulators.  
1179 *Nature* *403*, 335–338.
- 1180 Flenner, E., Marga, F., Neagu, A., Kosztin, I., and Forgacs, G. (2008). Relating Biophysical Properties  
1181 Across Scales. In *Multiscale Modeling of Developmental Systems*, S. Schnell, P.K. Maini, S.A. Newman,  
1182 and T.J.B.T.-C.T. in D.B. Newman, eds. (Academic Press), pp. 461–483.
- 1183 Ghosh, R., and Tomlin, C.J. (2001). Lateral Inhibition through Delta-Notch Signaling: A Piecewise  
1184 Affine Hybrid Model BT - Hybrid Systems: Computation and Control. M.D. Di Benedetto, and A.  
1185 Sangiovanni-Vincentelli, eds. (Berlin, Heidelberg: Springer Berlin Heidelberg), pp. 232–246.
- 1186 Glazier, J.A., and Graner, F. (1993). Simulation of the differential adhesion driven rearrangement of  
1187 biological cells. *Phys. Rev. E* *47*, 2128–2154.
- 1188 Gossler, A., and de Angelis, M.H. (1997). 6 Somitogenesis. R.A. Pedersen, and G.P.B.T.-C.T. in D.B.  
1189 Schatten, eds. (Academic Press), pp. 225–287.
- 1190 Gumbiner, B.M. (1996). Cell Adhesion: The Molecular Basis of Tissue Architecture and Morphogenesis.  
1191 *Cell* *84*, 345–357.
- 1192 Hartfield, R.M., Schwarz, K.A., Muldoon, J.J., Bagheri, N., and Leonard, J.N. (2017). Multiplexing  
1193 Engineered Receptors for Multiparametric Evaluation of Environmental Ligands. *ACS Synth. Biol.* *6*,  
1194 2042–2055.
- 1195 Hester, S.D., Belmonte, J.M., Gens, J.S., Clendenon, S.G., and Glazier, J.A. (2011). A Multi-cell, Multi-  
1196 scale Model of Vertebrate Segmentation and Somite Formation. *PLOS Comput. Biol.* *7*, e1002155.

- 1197 Hutson, M.S., Leung, M.C.K., Baker, N.C., Spencer, R.M., and Knudsen, T.B. (2017). Computational  
1198 Model of Secondary Palate Fusion and Disruption. *Chem. Res. Toxicol.* *30*, 965–979.
- 1199 Kobayashi, T., Soegiarto, D.W., Yang, Y., Lanske, B., Schipani, E., McMahon, A.P., and Kronenberg,  
1200 H.M. (2005). Indian hedgehog stimulates periarticular chondrocyte differentiation to regulate growth  
1201 plate length independently of PTHrP. *J. Clin. Invest.* *115*, 1734–1742.
- 1202 Lakatos, D., Somfai, E., Méhes, E., and Czirók, A. (2018). Soluble VEGFR1 signaling guides vascular  
1203 patterns into dense branching morphologies. *J. Theor. Biol.* *456*, 261–278.
- 1204 Lambert, B., MacLean, A.L., Fletcher, A.G., Combes, A.N., Little, M.H., and Byrne, H.M. (2018).  
1205 Bayesian inference of agent-based models: a tool for studying kidney branching morphogenesis. *J. Math.*  
1206 *Biol.* *76*, 1673–1697.
- 1207 Li, Y., and Dudley, A.T. (2009). Noncanonical frizzled signaling regulates cell polarity of growth plate  
1208 chondrocytes. *Development* *136*, 1083 LP – 1092.
- 1209 Li, P., Markson, J.S., Wang, S., Chen, S., Vachharajani, V., and Elowitz, M.B. (2018). Morphogen  
1210 gradient reconstitution reveals Hedgehog pathway design principles. *Science* (80-. ).
- 1211 Libby, A.R.G., Joy, D.A., So, P.-L., Mandegar, M.A., Muncie, J.M., Mendoza-Camacho, F.N., Weaver,  
1212 V.M., Conklin, B.R., and McDevitt, T.C. (2018). Spatiotemporal mosaic self-patterning of pluripotent  
1213 stem cells using CRISPR interference. *Elife* *7*, e36045.
- 1214 Lim, W.A. (2010). Designing customized cell signalling circuits. *Nat. Rev. Mol. Cell Biol.* *11*, 393–403.
- 1215 Lin, C.-M., Jiang, T.X., Baker, R.E., Maini, P.K., Widelitz, R.B., and Chuong, C.-M. (2009). Spots and  
1216 stripes: Pleomorphic patterning of stem cells via p-ERK-dependent cell chemotaxis shown by feather  
1217 morphogenesis and mathematical simulation. *Dev. Biol.* *334*, 369–382.
- 1218 Marin-Riera, M., Moustakas-Verho, J., Savriama, Y., Jernvall, J., and Salazar-Ciudad, I. (2018).  
1219 Differential tissue growth and cell adhesion alone drive early tooth morphogenesis: An ex vivo and in  
1220 silico study. *PLOS Comput. Biol.* *14*, e1005981.
- 1221 Massagué, J. (1990). Transforming growth factor- $\alpha$ . A model for membrane-anchored growth factors.  
1222 *J. Biol. Chem.* *265*, 21393–21396.
- 1223 Massagué, J., and Pandiella, A. (1993). MEMBRANE-ANCHORED GROWTH FACTORS. *Annu. Rev.*  
1224 *Biochem.* *62*, 515–541.
- 1225 McGrew, M.J., and Pourquié, O. (1998). Somitogenesis: segmenting a vertebrate. *Curr. Opin. Genet.*  
1226 *Dev.* *8*, 487–493.
- 1227 Mongera, A., Rowghanian, P., Gustafson, H.J., Shelton, E., Kealhofer, D.A., Carn, E.K., Serwane, F.,  
1228 Lucio, A.A., Giammona, J., and Campàs, O. (2018). A fluid-to-solid jamming transition underlies  
1229 vertebrate body axis elongation. *Nature* *561*, 401–405.
- 1230 Morsut, L., Roybal, K.T., Xiong, X., Gordley, R.M., Coyle, S.M., Thomson, M., and Lim, W.A. (2016).  
1231 Engineering Customized Cell Sensing and Response Behaviors Using Synthetic Notch Receptors. *Cell*  
1232 *164*, 780–791.
- 1233 Mukherji, S., and van Oudenaarden, A. (2009). Synthetic biology: understanding biological design from  
1234 synthetic circuits. *Nat. Rev. Genet.* *10*, 859–871.
- 1235 Nelson, W.J. (2003). Tube morphogenesis: closure, but many openings remain. *Trends Cell Biol.* *13*,  
1236 615–621.



- 1237 Nieman, M.T., Prudoff, R.S., Johnson, K.R., and Wheelock, M.J. (1999). N-Cadherin Promotes Motility  
1238 in Human Breast Cancer Cells Regardless of Their E-Cadherin Expression. *J. Cell Biol.* *147*, 631 LP –  
1239 644.
- 1240 Olimpio, E.P., Dang, Y., and Youk, H. (2018). Statistical Dynamics of Spatial-Order Formation by  
1241 Communicating Cells. *IScience* *2*, 27–40.
- 1242 Ollé-Vila, A., Duran-Nebreda, S., Conde-Pueyo, N., Montañez, R., and Solé, R. (2016). A morphospace  
1243 for synthetic organs and organoids: the possible and the actual. *Integr. Biol.* *8*, 485–503.
- 1244 Persson, J., Mölder, A.L., Pettersson, S.-G., and Alm, K. (2010). Cell motility studies using digital  
1245 holographic microscopy. p.
- 1246 Qian, F., Watnick, T.J., Onuchic, L.F., and Germino, G.G. (1996). The Molecular Basis of Focal Cyst  
1247 Formation in Human Autosomal Dominant Polycystic Kidney Disease Type I. *Cell* *87*, 979–987.
- 1248 Qudrat, A., and Truong, K. (2017). Engineering Synthetic Proteins to Generate Ca<sup>2+</sup> Signals in  
1249 Mammalian Cells. *ACS Synth. Biol.* *6*, 582–590.
- 1250 Qudrat, A., and Truong, K. (2018). Antibody-Based Fusion Proteins Allow Ca<sup>2+</sup> Rewiring to Most  
1251 Extracellular Ligands. *ACS Synth. Biol.* *7*, 531–539.
- 1252 Reeve, R., and Turner, J.R. (2013). Pharmacodynamic Models: Parameterizing the Hill Equation,  
1253 Michaelis-Menten, the Logistic Curve, and Relationships Among These Models. *J. Biopharm. Stat.* *23*,  
1254 648–661.
- 1255 Santorelli, M., Perna, D., Isomura, A., Garzilli, I., Annunziata, F., Postiglione, L., Tumaini, B.,  
1256 Kageyama, R., and di Bernardo, D. (2018). Reconstitution of an Ultradian Oscillator in Mammalian Cells  
1257 by a Synthetic Biology Approach. *ACS Synth. Biol.* *7*, 1447–1455.
- 1258 Santorelli, M., Lam, C., and Morsut, L. (2019). Synthetic development: building mammalian multicellular  
1259 structures with artificial genetic programs. *Curr. Opin. Biotechnol.* *59*, 130–140.
- 1260 Scheller, L., Strittmatter, T., Fuchs, D., Bojar, D., and Fussenegger, M. (2018). Generalized extracellular  
1261 molecule sensor platform for programming cellular behavior. *Nat. Chem. Biol.* *14*, 723–729.
- 1262 Schneider, C.A., Rasband, W.S., and Eliceiri, K.W. (2012). NIH Image to ImageJ: 25 years of image  
1263 analysis. *Nat. Methods* *9*, 671–675.
- 1264 Shaya, O., Binshtok, U., Hersch, M., Rivkin, D., Weinreb, S., Amir-Zilberstein, L., Khamaisi, B.,  
1265 Oppenheim, O., Desai, R.A., Goodyear, R.J., et al. (2017). Cell-Cell Contact Area Affects Notch  
1266 Signaling and Notch-Dependent Patterning. *Dev. Cell* *40*, 505–511.e6.
- 1267 Simakov, S A David, and Pismen, L.M. (2013). Discrete model of periodic pattern formation through a  
1268 combined autocrine–juxtacrine cell signaling. *Phys. Biol.* *10*, 46001.
- 1269 Sprinzak, D., Lakhanpal, A., LeBon, L., Santat, L.A., Fontes, M.E., Anderson, G.A., Garcia-Ojalvo, J.,  
1270 and Elowitz, M.B. (2010). Cis-interactions between Notch and Delta generate mutually exclusive  
1271 signalling states. *Nature* *465*, 86–90.
- 1272 Sprinzak, D., Lakhanpal, A., LeBon, L., Garcia-Ojalvo, J., and Elowitz, M.B. (2011). Mutual Inactivation  
1273 of Notch Receptors and Ligands Facilitates Developmental Patterning. *PLOS Comput. Biol.* *7*, e1002069.
- 1274 Sun, Y., and Wang, Q. (2013). Modeling and simulations of multicellular aggregate self-assembly in  
1275 biofabrication using kinetic Monte Carlo methods. *Soft Matter* *9*, 2172–2186.
- 1276 Swat, M.H., Thomas, G.L., Belmonte, J.M., Shirinifard, A., Hmeljak, D., and Glazier, J.A. (2012).

- 1277 Chapter 13 - Multi-Scale Modeling of Tissues Using CompuCell3D. In *Computational Methods in Cell*  
1278 *Biology*, A.R. Asthagiri, and A.P.B.T.-M. in C.B. Arkin, eds. (Academic Press), pp. 325–366.
- 1279 Swat, M.H., Thomas, G.L., Shirinifard, A., Clendenon, S.G., and Glazier, J.A. (2015). Emergent  
1280 Stratification in Solid Tumors Selects for Reduced Cohesion of Tumor Cells: A Multi-Cell, Virtual-  
1281 Tissue Model of Tumor Evolution Using CompuCell3D. *PLoS One* *10*, e0127972.
- 1282 Takeichi, M. (2011). Self-Organization of Animal Tissues: Cadherin-Mediated Processes. *Dev. Cell* *21*,  
1283 24–26.
- 1284 Tigges, M., Marquez-Lago, T.T., Stelling, J., and Fussenegger, M. (2009). A tunable synthetic  
1285 mammalian oscillator. *Nature* *457*, 309–312.
- 1286 Toda, S., Blauch, L.R., Tang, S.K.Y., Morsut, L., and Lim, W.A. (2018). Programming self-organizing  
1287 multicellular structures with synthetic cell-cell signaling. *Science* (80-. ). *361*, 156 LP – 162.
- 1288 Toda, S., Brunger, J.M., and Lim, W.A. (2019). Synthetic development: learning to program multicellular  
1289 self-organization. *Curr. Opin. Syst. Biol.* *14*, 41–49.
- 1290 Togashi, H., Kominami, K., Waseda, M., Komura, H., Miyoshi, J., Takeichi, M., and Takai, Y. (2011).  
1291 Nectins Establish a Checkerboard-Like Cellular Pattern in the Auditory Epithelium. *Science* (80-. ). *333*,  
1292 1144 LP – 1147.
- 1293 Turner, D.A., Baillie-Johnson, P., and Martinez Arias, A. (2016). Organoids and the genetically encoded  
1294 self-assembly of embryonic stem cells. *BioEssays* *38*, 181–191.
- 1295 Wadell, H. (1932). Volume, Shape, and Roundness of Rock Particles. *J. Geol.* *40*, 443–451.
- 1296 Watson, A.J. (1992). The cell biology of blastocyst development. *Mol. Reprod. Dev.* *33*, 492–504.
- 1297  
1298  
1299  
1300

**Fig. 1****(a)****Biological**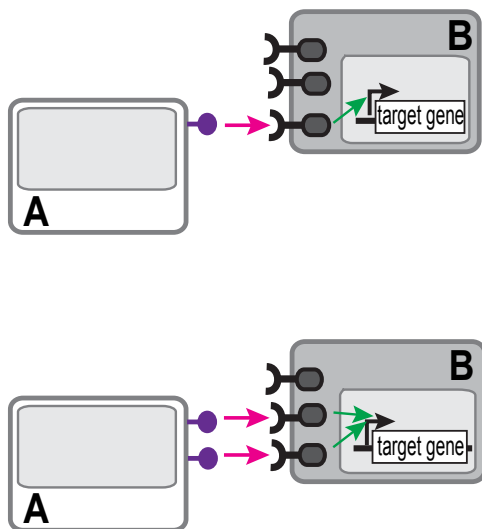***In silico***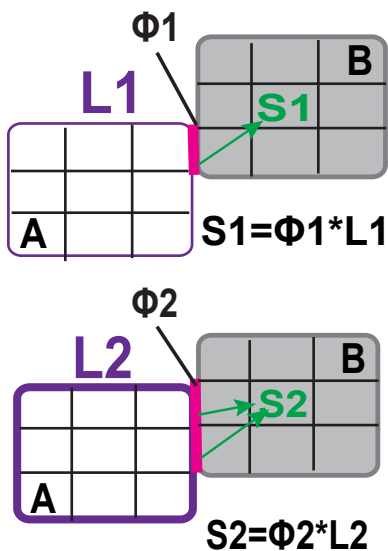**(b) Target gene induction over time**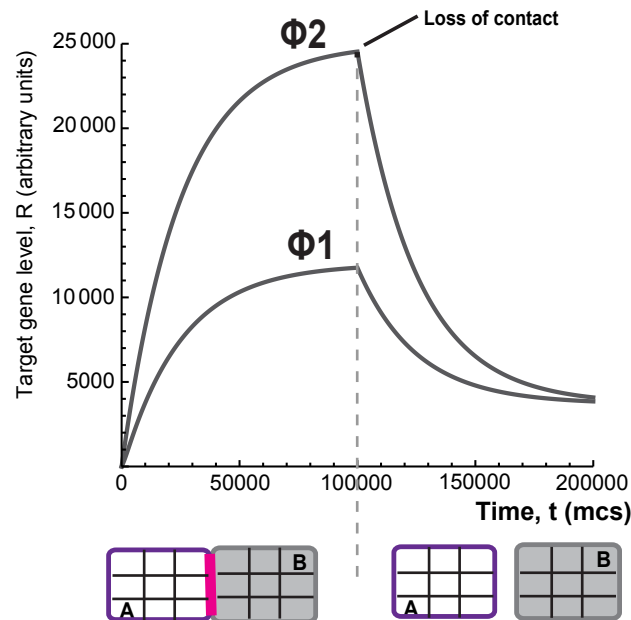**(c)****Biological**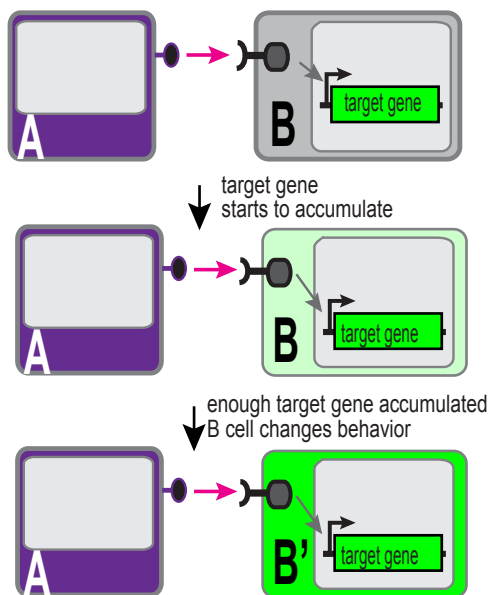***In silico***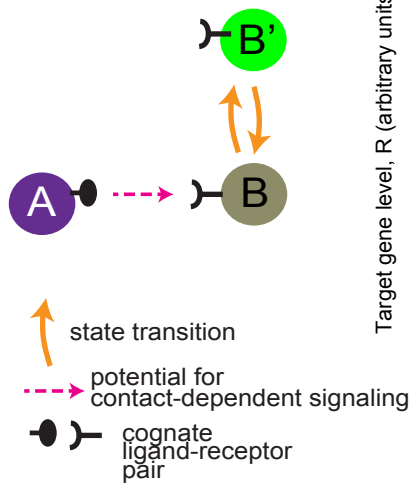**(d)****Cell States Over Time**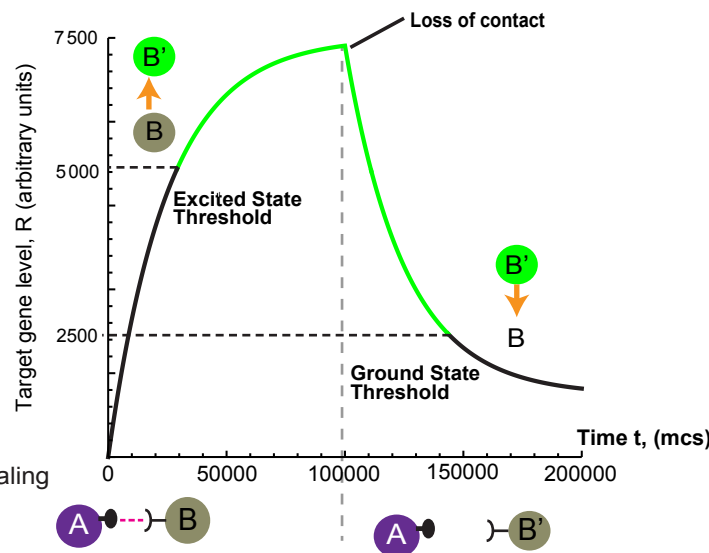

**Fig. 2**

**(a) *In vitro***

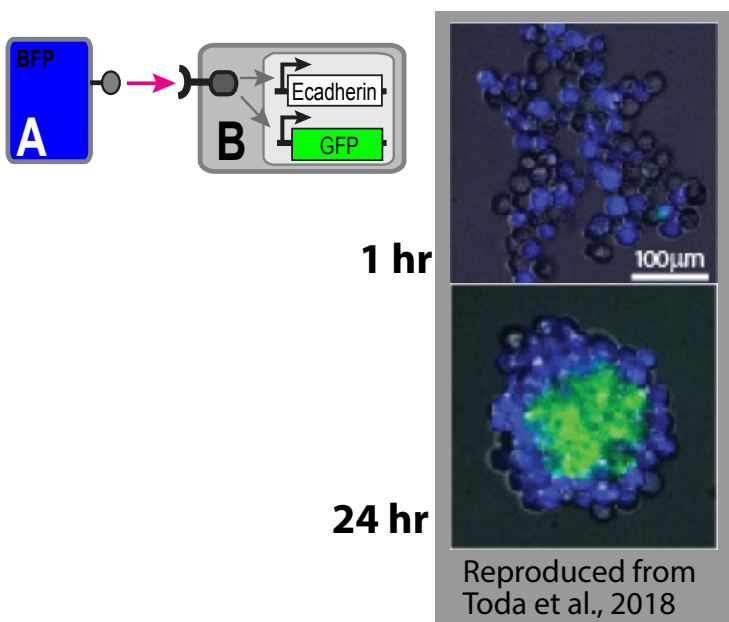

**(b) *In silico***

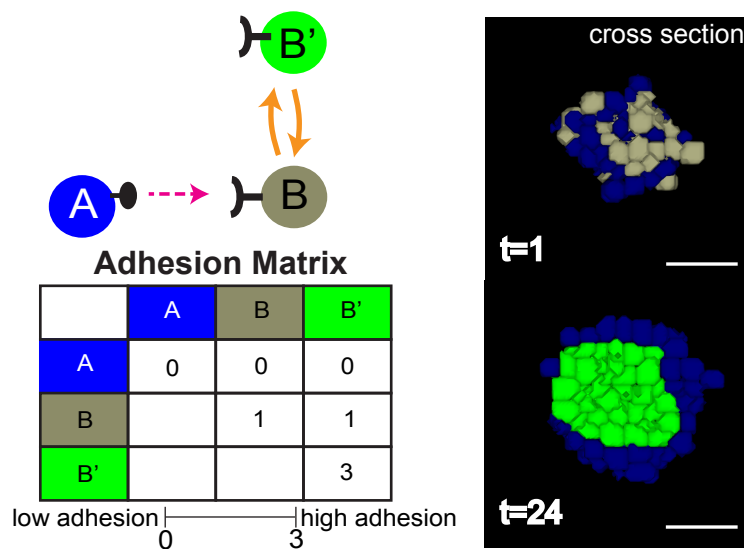

**(c)**

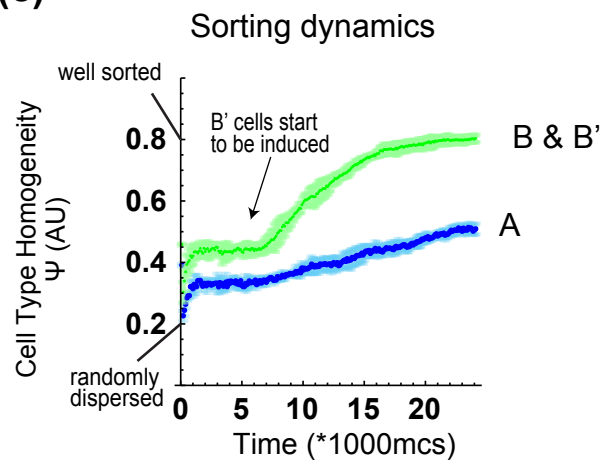

**Fig. 3**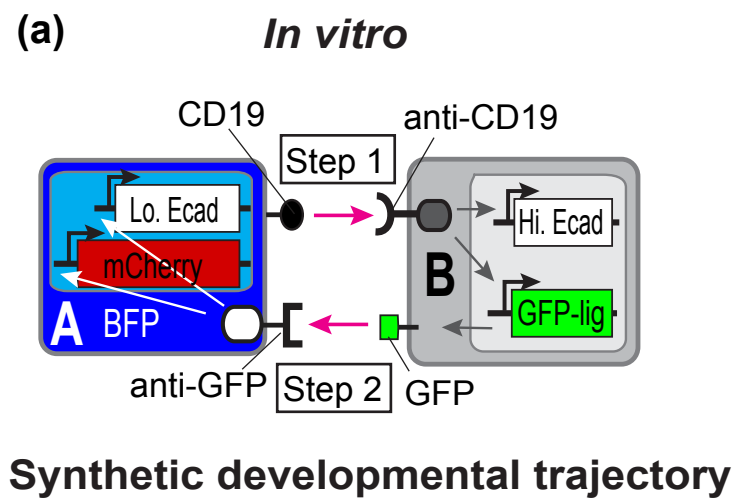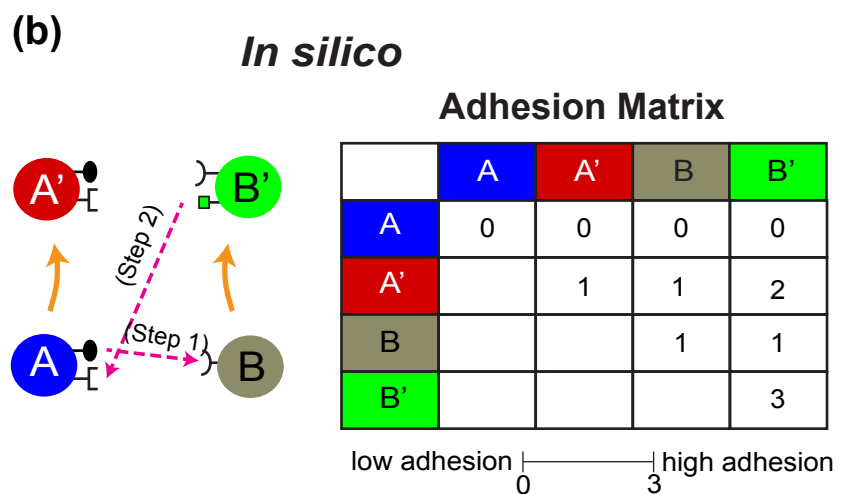

**Regeneration**

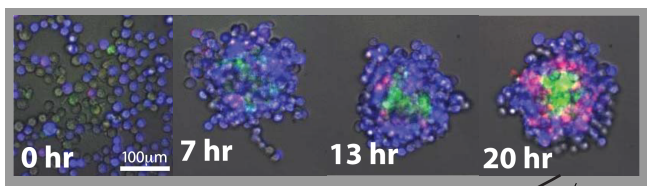

***In silico***

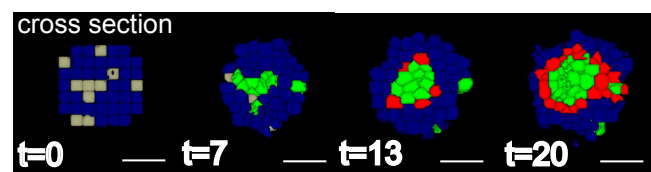

**Regeneration**

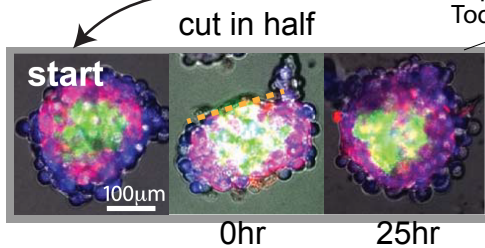

Reproduced from  
Toda et al., 2018

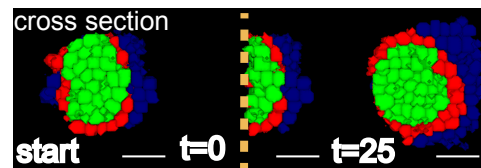

**(c) Cell activation dynamics**

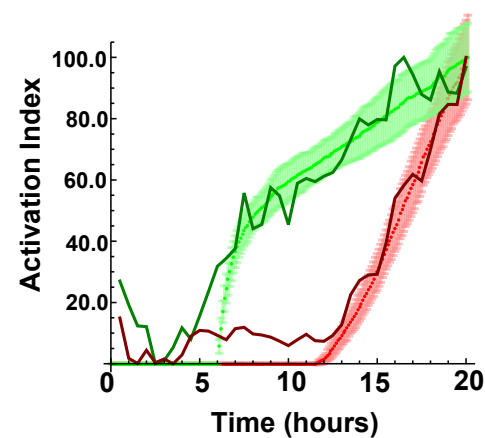

— Biological A'  
 +++ Model A'  
 — Biological B'  
 +++ Model B'

**(d) Morphology dynamics**

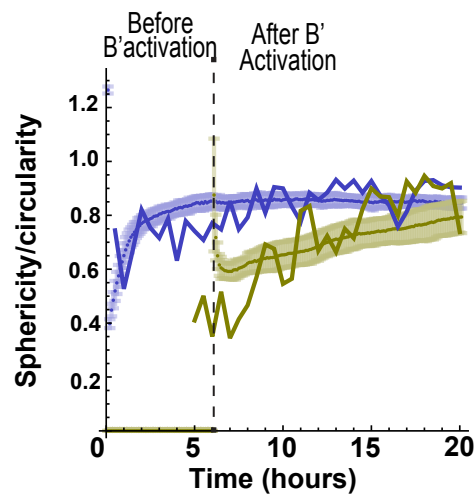

— Biological All Cells  
 +++ Model  
 — Biological A' and B' cells only  
 +++ Model

**(e)**

**Core(s) Distribution**

*In vitro*

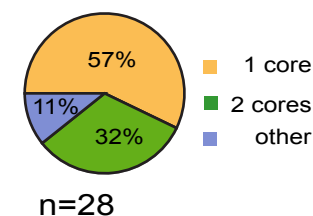

*In silico*

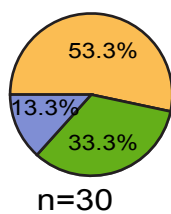

1 core  
2 cores  
other



**Fig. 4**  
**(a)**

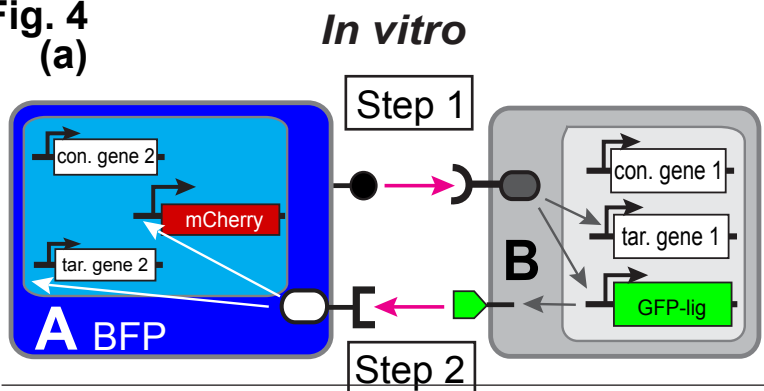

**In silico**

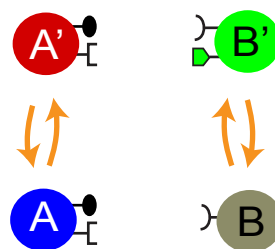

**Gene Matrix**

|               |             |      |
|---------------|-------------|------|
| <b>cell B</b> | con. gene 1 | none |
|               | tar. gene 1 | Ecad |
| <b>cell A</b> | con. gene 2 | none |
|               | tar. gene 2 | Pcad |

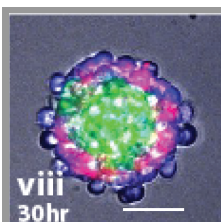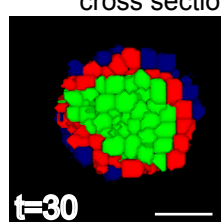

**Adhesion Matrix**

|    |   |    |   |    |
|----|---|----|---|----|
|    | A | A' | B | B' |
| A  | 1 | 1  | 0 | 1  |
| A' |   | 2  | 1 | 2  |
| B  |   |    | 1 | 1  |
| B' |   |    |   | 3  |

**Gene Matrix**

|               |             |          |
|---------------|-------------|----------|
| <b>cell B</b> | con. gene 1 | none     |
|               | tar. gene 1 | Hi. Ecad |
| <b>cell A</b> | con. gene 2 | Pcad     |
|               | tar. gene 2 | none     |

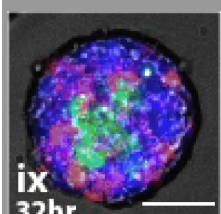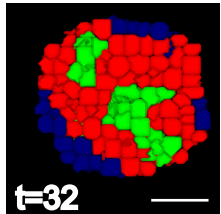

**Adhesion Matrix**

|    |   |    |   |    |
|----|---|----|---|----|
|    | A | A' | B | B' |
| A  | 1 | 1  | 1 | 1  |
| A' |   | 1  | 1 | 1  |
| B  |   |    | 1 | 1  |
| B' |   |    |   | 3  |

**Gene Matrix**

|               |             |      |
|---------------|-------------|------|
| <b>cell B</b> | con. gene 1 | none |
|               | tar. gene 1 | Ncad |
| <b>cell A</b> | con. gene 2 | none |
|               | tar. gene 2 | Pcad |

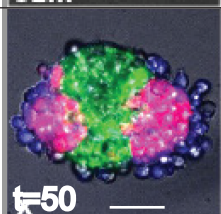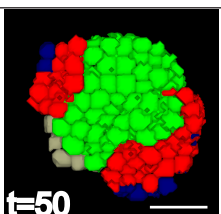

**Adhesion Matrix**

|    |   |    |   |    |
|----|---|----|---|----|
|    | A | A' | B | B' |
| A  | 1 | 1  | 0 | 0  |
| A' |   | 2  | 0 | 0  |
| B  |   |    | 1 | 1  |
| B' |   |    |   | 2  |

**Gene Matrix**

|               |             |      |
|---------------|-------------|------|
| <b>cell B</b> | con. gene 1 | none |
|               | tar. gene 1 | Ncad |
| <b>cell A</b> | con. gene 2 | Pcad |
|               | tar. gene 2 | none |

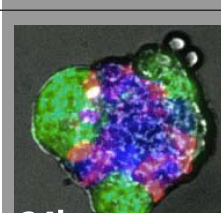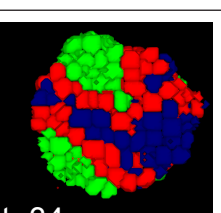

**Adhesion Matrix**

|    |   |    |   |    |
|----|---|----|---|----|
|    | A | A' | B | B' |
| A  | 1 | 1  | 0 | 0  |
| A' |   | 1  | 0 | 0  |
| B  |   |    | 1 | 1  |
| B' |   |    |   | 2  |

**Estimated in vitro adhesion preferences:**

Pcad:Pcad = Ncad:Ncad > Pcad:Ncad

Hi. Ecad: Hi. Ecad > Hi. Ecad: Lo. Ecad > Lo. Ecad: Lo. Ecad

Reproduced from  
Toda et al., 2018

low adhesion 0 high adhesion 3

**(b)**

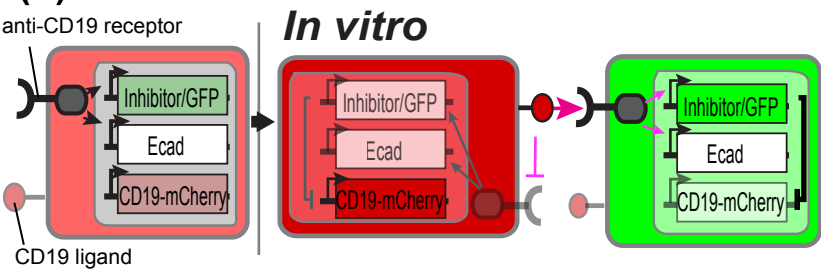

**In silico**

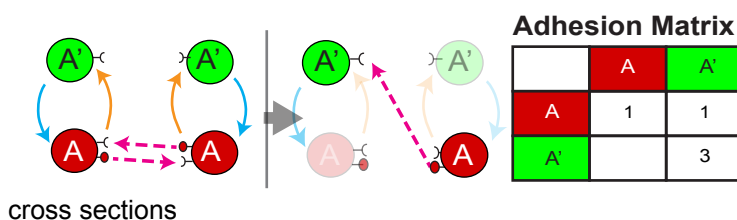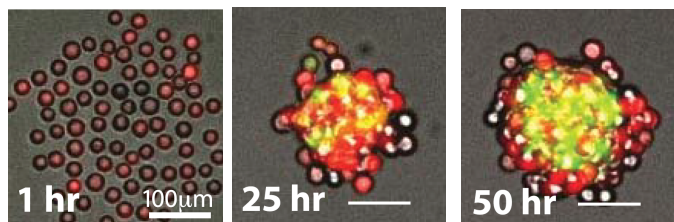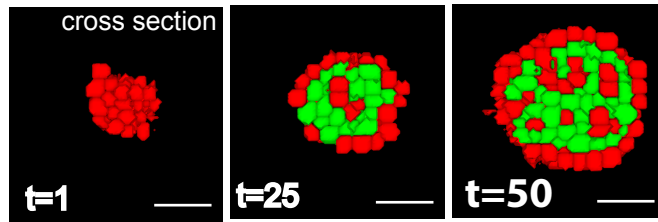

**Fig. 5**

**(a) Goal trajectory**

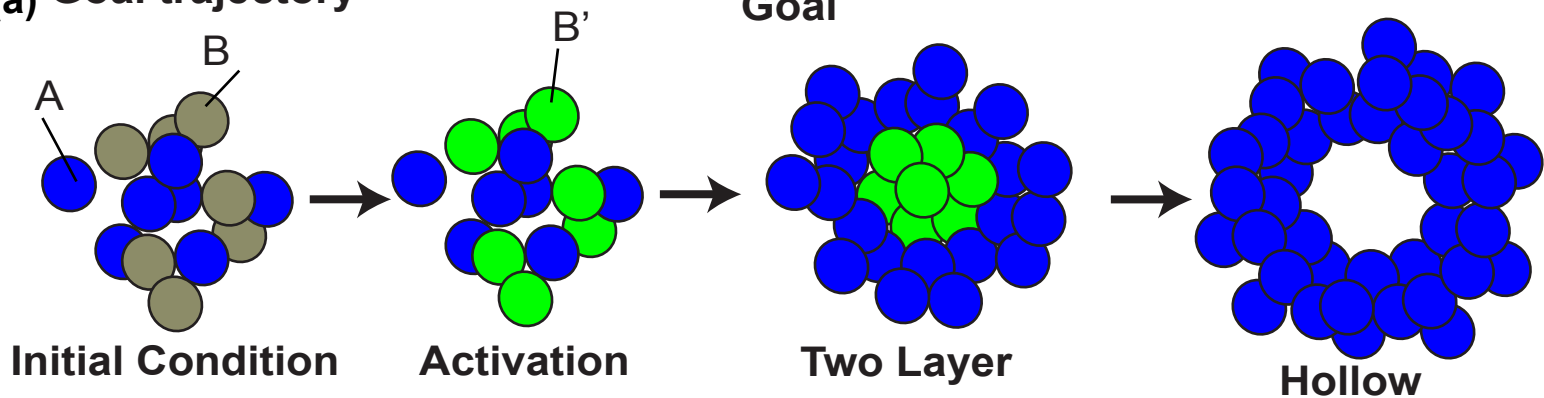

**(b) Proposed Model**

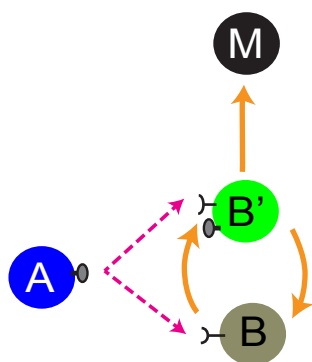

**Adhesion Matrix**

|    | A | B | B' |
|----|---|---|----|
| A  | 0 | 0 | 0  |
| B  |   | 1 | 1  |
| B' |   |   | 3  |

low adhesion  $\frac{0}{0}$   $\frac{3}{3}$  high adhesion

**(c)**

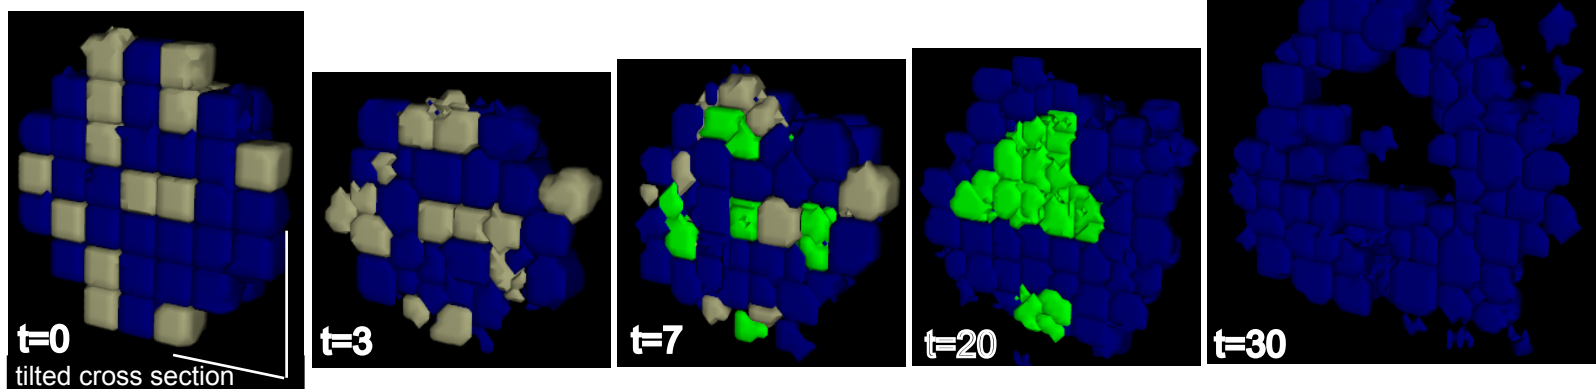

**(d)**

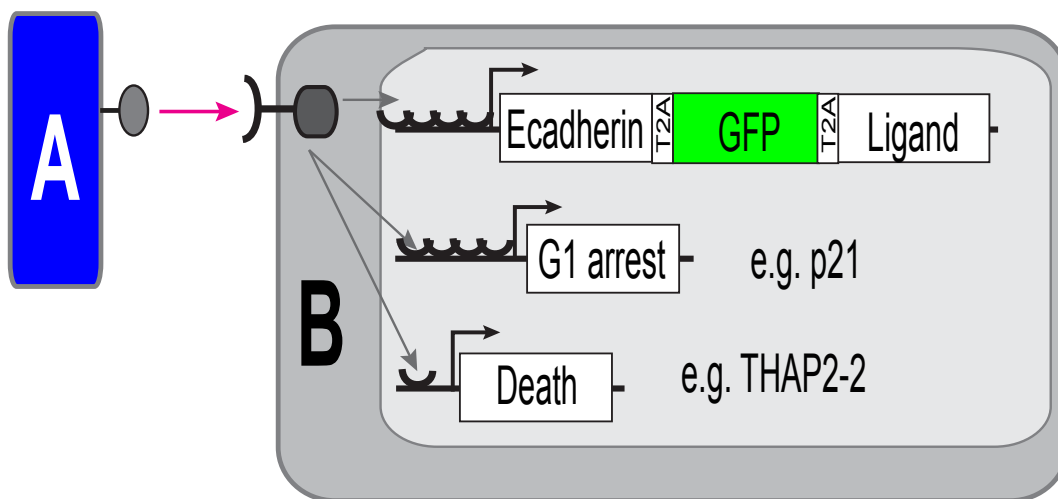

## Fig. 6

### (a) Goal trajectory

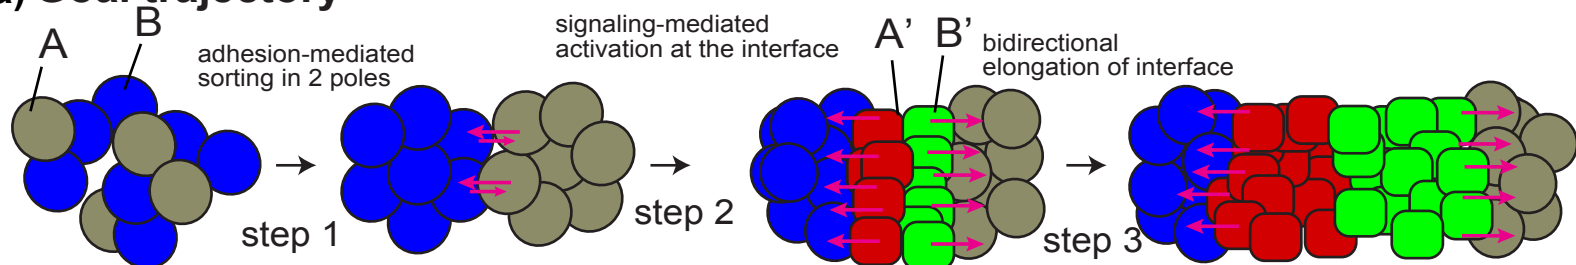

### (b) Proposed Network

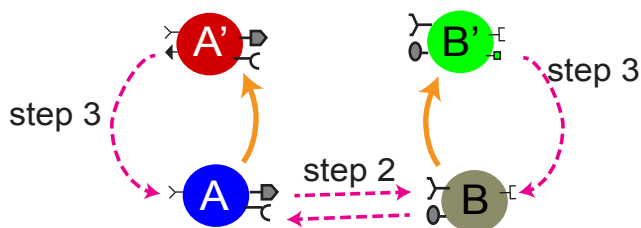

### Adhesion Matrix

|    | A | A' | B | B' |
|----|---|----|---|----|
| A  | 2 | 0  | 0 | 0  |
| A' |   | 5  | 0 | 5  |
| B  |   |    | 2 | 0  |
| B' |   |    |   | 5  |

low adhesion 0 2 5 ultra high adhesion  
high adhesion

### (c) Implementation 1

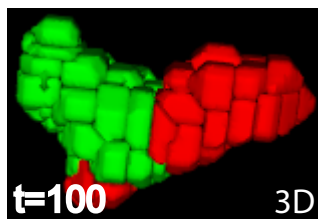

### (d)

Implementation 1  
with controlled  
initial condition

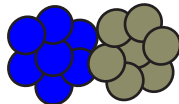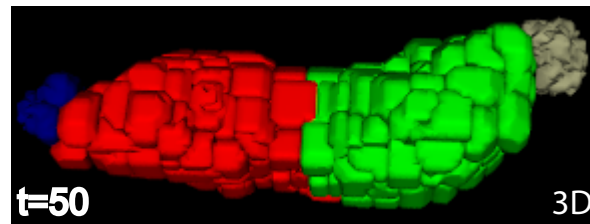

### (e) Implementation 2

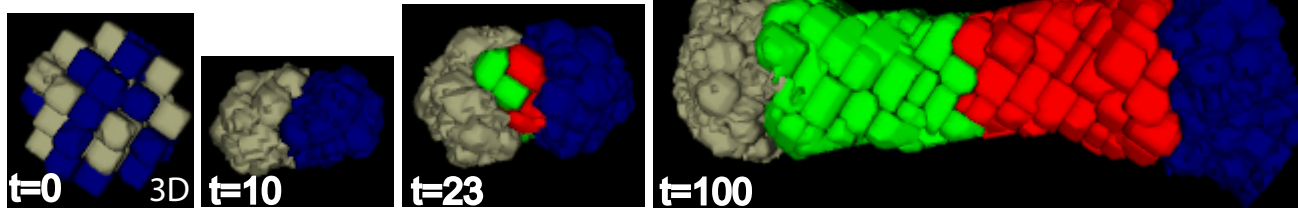

### (f)

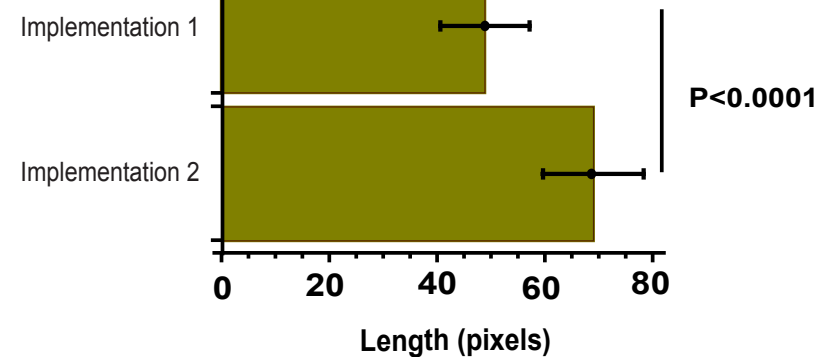

## Fig. 7

### (a) Goal trajectory

Initial Condition

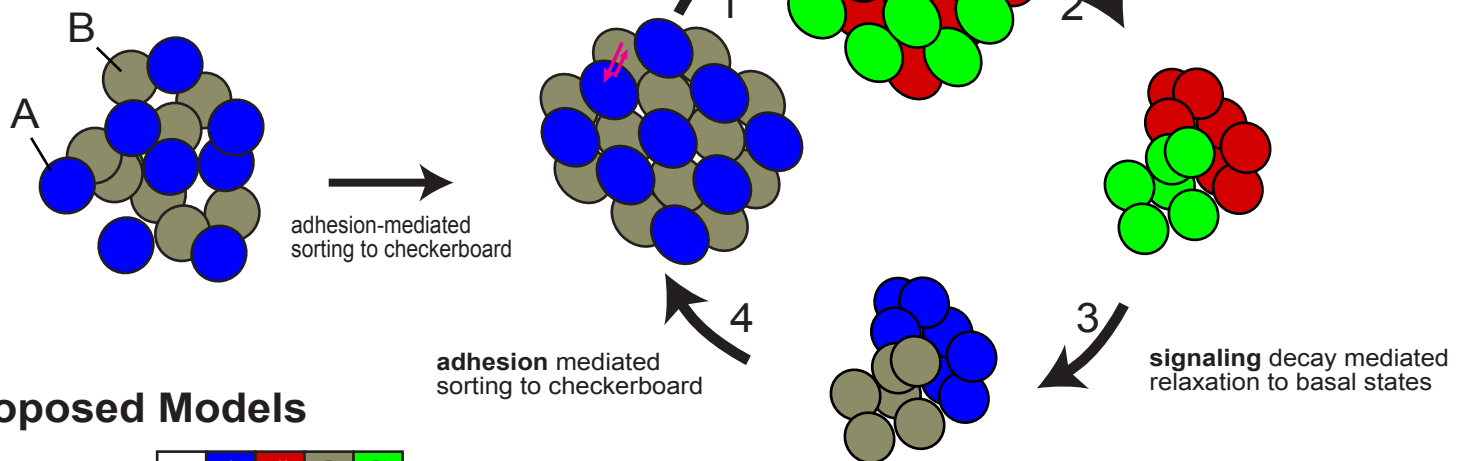

### (b) Proposed Models

Adhesion Matrix

|    | A | A' | B | B' |
|----|---|----|---|----|
| A  | 0 | 0  | 2 | 0  |
| A' |   | 2  | 0 | 0  |
| B  |   |    | 0 | 0  |
| B' |   |    |   | 2  |

Network 1

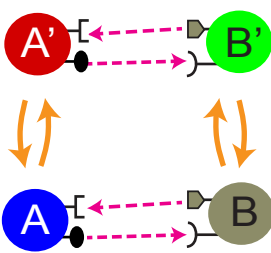

Network 2

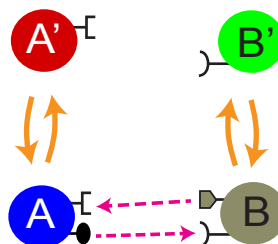

Network 3

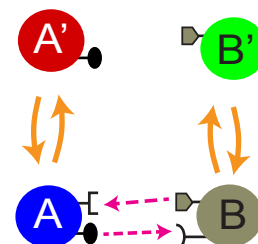

(c)

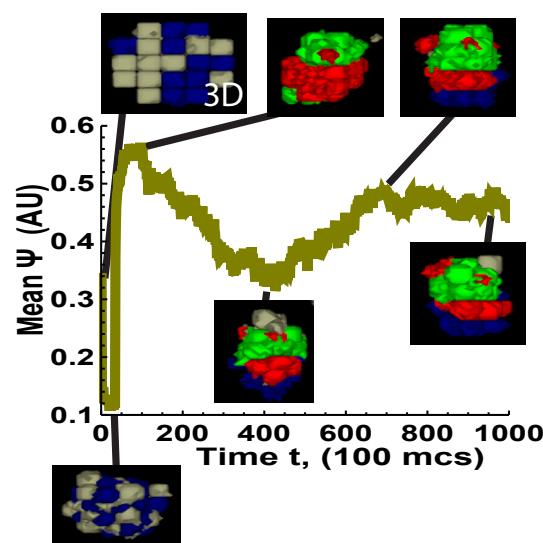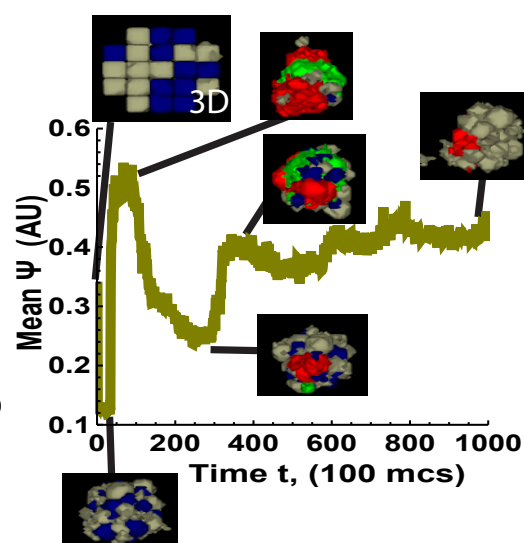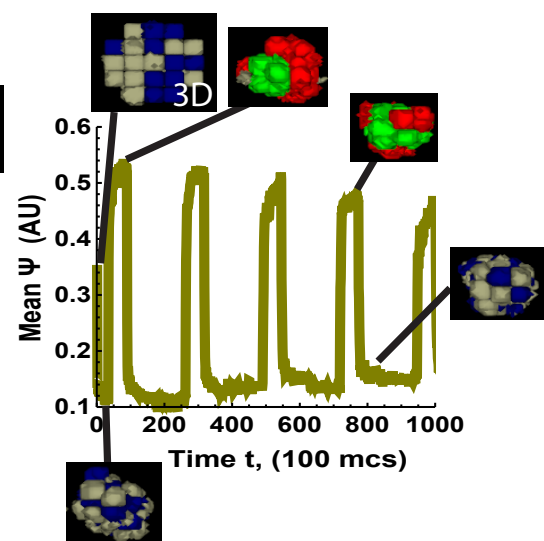

Source: https://www.biorxiv.org/content/10.1101/784496v1.full.pdf
